# Supplementary material for: Novel insights into deep groundwater exploration by geophysical estimation of hard rock permeability
Source: Copernicus journal article supplement (doi:10.5194/egusphere-2024-4191), 2025-01-22
Supplement: Supplementary file [file egusphere-2024-4191-CC2-supplement.pdf]

# Journal of Hydrology

## Geophysical prediction of 2D and 3D hydraulic conductivity in deep hard-rock aquifers

--Manuscript Draft--

|                           |                                                                                                                                                                                                                                                                                                                                                                                                                                                                                                                                                                                                                                                                                                                                                                                                                                                                                                                                                                                                                                                                                                                                                                                                                                                                                                                                                                                                                                                                                                                                                                                                                                                                                                                                                                                                                                                                                                                                                                                                                                                                                                                           |
|---------------------------|---------------------------------------------------------------------------------------------------------------------------------------------------------------------------------------------------------------------------------------------------------------------------------------------------------------------------------------------------------------------------------------------------------------------------------------------------------------------------------------------------------------------------------------------------------------------------------------------------------------------------------------------------------------------------------------------------------------------------------------------------------------------------------------------------------------------------------------------------------------------------------------------------------------------------------------------------------------------------------------------------------------------------------------------------------------------------------------------------------------------------------------------------------------------------------------------------------------------------------------------------------------------------------------------------------------------------------------------------------------------------------------------------------------------------------------------------------------------------------------------------------------------------------------------------------------------------------------------------------------------------------------------------------------------------------------------------------------------------------------------------------------------------------------------------------------------------------------------------------------------------------------------------------------------------------------------------------------------------------------------------------------------------------------------------------------------------------------------------------------------------|
| <b>Manuscript Number:</b> | HYDROL65101                                                                                                                                                                                                                                                                                                                                                                                                                                                                                                                                                                                                                                                                                                                                                                                                                                                                                                                                                                                                                                                                                                                                                                                                                                                                                                                                                                                                                                                                                                                                                                                                                                                                                                                                                                                                                                                                                                                                                                                                                                                                                                               |
| <b>Article Type:</b>      | Research paper                                                                                                                                                                                                                                                                                                                                                                                                                                                                                                                                                                                                                                                                                                                                                                                                                                                                                                                                                                                                                                                                                                                                                                                                                                                                                                                                                                                                                                                                                                                                                                                                                                                                                                                                                                                                                                                                                                                                                                                                                                                                                                            |
| <b>Keywords:</b>          | Hydraulic conductivity (K); Controlled-source audio-frequency magnetotellurics (CSAMT); Hydraulic parameters; Groundwater; Hard rock; Hydrogeological uncertainty                                                                                                                                                                                                                                                                                                                                                                                                                                                                                                                                                                                                                                                                                                                                                                                                                                                                                                                                                                                                                                                                                                                                                                                                                                                                                                                                                                                                                                                                                                                                                                                                                                                                                                                                                                                                                                                                                                                                                         |
| <b>Abstract:</b>          | <p>Future scenario prediction and efficient groundwater management depend on an accurate estimation of hydraulic parameters. One of the most common aquifer parameters studied in groundwater investigations is hydraulic conductivity (K). Conventionally, K is measured via boreholes. Traditional methods, on the other hand, have a number of drawbacks, including as the fact that they are intrusive, costly, time-consuming, and only provide point-scale K measurements; they are also not applicable to regions with very varied topographies. Besides, deep groundwater assessment might not be possible using conventional methods. Contrarily, geophysical methods can evaluate subsurface hydrogeological conditions across vast areas with less effort and without invasiveness, as well as at lower cost and in less time. K has previously been estimated through a number of empirically based geophysical investigations. However, the VES (vertical electrical sounding) approach was employed in these investigations to estimate only 1D K, primarily at shallow depths in a homogenous context. Because hard rock terrains are inherently heterogeneous, accurately assessing the aquifer potential associated with weathered layers and fractures/faults using borehole/VES-based K is problematic. To this end, this work employs the CSAMT (controlled-source audio-frequency magnetotellurics) approach for the first time to estimate 2D and 3D K over a depth of 1 km. In the extremely varied contexts of various rocks, the suggested approach evaluates the water-bearing capacity of geological layers and gives a more thorough and precise evaluation of groundwater potential. Compared with the past studies, these results provide a more accurate hydrogeological model, which in turn reduces the need for costly pumping tests and allows for a more thorough assessment of aquifer potential, which is essential for the scientific planning and management of groundwater resources in areas with very varied hard rock terrains where hydrogeological data is unavailable.</p> |

## **Highlights**

- For the first time, a non-invasive CSAMT method is proposed for 2D/3D K prediction
- K was first ever predicted over 1 km depth in heterogeneous setting
- Our approach reduces many boreholes for K prediction over large area
- This research, compared with past studies, provides deep groundwater assessment

1 **Geophysical prediction of 2D and 3D hydraulic conductivity in deep hard-**  
2 **rock aquifers**

3 **Muhammad Hasan** <sup>a, b, c, \*</sup>, **Lijun Su** <sup>a, b, c, \*\*</sup>, **Peng Cui** <sup>a, b, c, d</sup>, **YanJun Shang** <sup>c, e</sup>

4 <sup>a</sup> *State Key Laboratory of Mountain Hazards and Engineering Resilience, Institute of Mountain*  
5 *Hazards and Environment, Chinese Academy of Sciences, Chengdu 610299, China*

6 <sup>b</sup> *China-Pakistan Joint Research Center on Earth Sciences, CAS-HEC, Islamabad, Pakistan*

7 <sup>c</sup> *University of Chinese Academy of Sciences, Beijing 100049, China*

8 <sup>d</sup> *Institute of Geographic Sciences and Natural Resources Research, CAS, Beijing, China*

9 <sup>e</sup> *Key Laboratory of Shale Gas and Geoengineering (KLSGG), Institute of Geology and*  
10 *Geophysics, Chinese Academy of Sciences, 100029 Beijing, P.R. China*

11 \*Corresponding authors:

12 Muhammad Hasan: Email: [mhasan@imde.ac.cn](mailto:mhasan@imde.ac.cn); ORCID: [https://orcid.org/0000-0001-6804-](https://orcid.org/0000-0001-6804-7962)  
13 [7962](https://orcid.org/0000-0001-6804-7962); Phone Number: +86-13051361710

14 Lijun Su: Email: [sulijun1976@163.com](mailto:sulijun1976@163.com); ORCID: <https://orcid.org/0000-0001-9972-4698>

15 Corresponding authors' postal address: State Key Laboratory of Mountain Hazards and  
16 Engineering Resilience, Institute of Mountain Hazards and Environment, Chinese Academy of  
17 Sciences, Chengdu 610299, China

18 Co-authors' emails:

19 Peng Cui: Email: [pengcui@imde.ac.cn](mailto:pengcui@imde.ac.cn)

20 YanJun Shang: Email: [jun94@mail.iggcas.ac.cn](mailto:jun94@mail.iggcas.ac.cn)

21

22

23 **Abstract:** Future scenario prediction and efficient groundwater management depend on an  
24 accurate estimation of hydraulic parameters. One of the most common aquifer parameters  
25 studied in groundwater investigations is hydraulic conductivity (K). Conventionally, K is  
26 measured via boreholes. Traditional methods, on the other hand, have a number of drawbacks,  
27 including as the fact that they are intrusive, costly, time-consuming, and only provide point-scale  
28 K measurements; they are also not applicable to regions with very varied topographies. Besides,  
29 deep groundwater assessment might not be possible using conventional methods. Contrarily,  
30 geophysical methods can evaluate subsurface hydrogeological conditions across vast areas with  
31 less effort and without invasiveness, as well as at lower cost and in less time. K has previously  
32 been estimated through a number of empirically based geophysical investigations.  
33 However, the VES (vertical electrical sounding) approach was employed in these investigations  
34 to estimate only 1D K, primarily at shallow depths in a homogenous context. Because hard rock  
35 terrains are inherently heterogeneous, accurately assessing the aquifer potential associated with  
36 weathered layers and fractures/faults using borehole/VES-based K is problematic. To this end,  
37 this work employs the CSAMT (controlled-source audio-frequency magnetotellurics) approach  
38 for the first time to estimate 2D and 3D K over a depth of 1 km. In the extremely varied contexts  
39 of various rocks, the suggested approach evaluates the water-bearing capacity of geological  
40 layers and gives a more thorough and precise evaluation of groundwater potential. Compared  
41 with the past studies, these results provide a more accurate hydrogeological model, which in turn  
42 reduces the need for costly pumping tests and allows for a more thorough assessment of aquifer  
43 potential, which is essential for the scientific planning and management of groundwater  
44 resources in areas with very varied hard rock terrains where hydrogeological data is unavailable.

45 **Keywords:** Hydraulic conductivity (K); Controlled-source audio-frequency magnetotellurics  
46 (CSAMT); Hydraulic parameters; Groundwater; Hard rock; Hydrogeological uncertainty

## 47 **1. Introduction**

48 Hard rock, including igneous and metamorphic rocks, makes up around 20–35% of  
49 Earth's surface (Amiotte Suchet et al., 2003; Gao et al., 2024). Groundwater research in hard  
50 rock primarily involves the evaluation of subsurface geological layers, faults, and fractures  
51 (Fernando and Pacheco, 2015; Hasan et al., 2021). An important part of groundwater monitoring  
52 and assessment is classifying the aquifer yield (water-retaining capability) of rock mass  
53 (Majumdar and Das, 2011; Nwosu et al., 2013; Rao et al., 2022). Many factors naturally  
54 determine the aquifer potential of rocks that contain water. These include the type of rock, its  
55 association and deformation, fractures, the amount of water that can penetrate, the joints between  
56 rocks, the mineral composition, the rate of weathering, and faults (Maréchal et al., 2004; Slater,  
57 2007; Vassolo et al., 2019). The main challenge in groundwater assessments is finding a way to  
58 measure the capacity of subsurface rocks to hold water both horizontally and vertically over  
59 large areas (Courtois et al., 2010; Dewandel et al., 2014). Groundwater extraction cannot proceed  
60 without first conducting a precise and comprehensive assessment of the aquifer potential  
61 associated with the various rock masses (Rao et al., 2022). Evaluating the water-carrying  
62 potential of geological layers is uncertain due to structural variability and a lack of data  
63 (Lachassagne et al., 2001; Misstear et al., 2009; Worthington et al., 2016). Ignorance of  
64 hydrogeological uncertainty may lead to a number of groundwater and environmental issues  
65 (Dewandel et al., 2004; Refsgaard et al., 2012; Lachassagne et al., 2021). Assessing the state of  
66 the geological layers for continuous groundwater assessments and reducing expenses without  
67 sacrificing efficacy are challenging tasks in groundwater research.

68 Groundwater resources are rapidly depleting over the world (Rodell et al., 2009; Wada et  
69 al., 2010; Laghari et al., 2012; Wada et al., 2014; Nguyen et al., 2022; Jasechko et al., 2024).  
70 Therefore, it is critical to conduct an accurate and comprehensive evaluation of groundwater  
71 resources in order to manage and make use of these valuable reserves. Groundwater evaluations  
72 rely heavily on hydraulic characteristics. The most often adopted aquifer measure, hydraulic  
73 conductivity, is primarily world widely used to evaluate the rocks' capacity to hold water (Sale,  
74 2001; Chandra et al., 2008; Camporese et al., 2011; Niwas and Celik et al., 2012; Fu et al., 2015;  
75 Dewandel et al., 2017; Trinh et al., 2018; Ferris et al., 2020; Minutti et al., 2020; Asfahani, 2023;  
76 Leal et al., 2023; Cui et al., 2024; Gao et al., 2024). Hydraulic conductivity is typically used to  
77 determine the aquifer potential of geological layers (Chen et al., 2001; Attwa et al., 2014; Bréard  
78 Lanoix et al., 2020). Aquifer parameters are generally measured via borehole testing (De Lima  
79 and Niwas., 2000; Yao et al., 2013; Oli et al., 2022; Zoorabadi et al., 2022; Yang and Zhang,  
80 2024). While boreholes do provide improved geological information, the process of creating a  
81 thorough 2D study is laborious and fraught with serious drawbacks (Hubbard and Rubin, 2002;  
82 Niwas and De Lima, 2003; Gao et al., 2024). Borehole methods are costly and time-consuming,  
83 necessitate large apparatus or machinery, are challenging to execute in higher landscapes, only  
84 offer localized information, are unable to image lateral geological structures, and cannot assess  
85 the deep subsurface structures (Singh, 2005; Roques et al., 2018; Hasan et al., 2021). These  
86 limitations make it challenging to regularly conduct a sizable number of drilling experiments,  
87 which implies that a lack of borehole data could cause uncertainty in the evaluation of  
88 groundwater resources. Alternatively, to significantly reduce the number of expensive boreholes  
89 and precisely estimate the groundwater potential of the prospective rock masses, a cost-effective  
90 approach is needed.

91 Geophysical techniques were used in a number of previous groundwater investigations  
92 (da Silva et al., 2004; Porsani et al., 2005; Chambers et al., 2006; Yadav and Singh, 2007;  
93 Francese et al., 2009; Parks et al., 2011; An et al., 2012; Fu et al., 2013; Vouillamoz et al., 2014;  
94 Robinson et al., 2016; McLachlan et al., 2017; Lin et al., 2018; Kouadio et al., 2020; Abbas et al.,  
95 2022; Kouadio et al., 2023; Zhang et al., 2024). Geophysical practices are faster, easier to use,  
96 less expensive, and non-invasive than drilling techniques (Rashid et al., 2012; Loperte et al.,  
97 2016; Gao et al., 2024). They can also provide comprehensive vertical and horizontal geological  
98 evaluations (Cassidy et al., 2014; Soro et al., 2017; Hasan et al., 2021). When it comes to  
99 gathering hydrogeological data from diverse habitats below ground, these techniques are head  
100 and shoulders above the competition (An et al., 2012; Wynn et al., 2016; Kouadio et al., 2023).  
101 Nowadays, resistivity surveys are frequently carried out in various groundwater investigations. A  
102 significant advantage of resistivity methods over other geophysical methods is that they provide  
103 a wider resistivity range than other geophysical parameters (Niwas and De Lima, 2003; Bentley  
104 and Gharibi, 2004; Robinson et al., 2016). The principal resistivity methods include the vertical  
105 electrical soundings (VES), electrical resistivity tomography (ERT) technique, and the controlled  
106 source audio-frequency magnetotellurics (CSAMT) method (Soupios et al., 2007; Di et al., 2020;  
107 Gao et al., 2024). VES method was mostly used in previous groundwater-based geophysical  
108 studies to assess groundwater resources only in one dimension (Chandra et al., 2008; Majumdar  
109 and Das, 2011; Niwas and Celik, 2012; Nwosu et al., 2013; Attwa et al., 2014; McLachlan et al.,  
110 2017; Hasan et al., 2021; Asfahani , 2023). In hard rock terrains, it is rare to assess aquifer yield  
111 using two and three dimensional hydraulic characteristics at large depths. Recent research has  
112 shown that CSAMT is the best geophysical approach for studying hard rocks in terms of both  
113 cost and suitability that aim to collect comprehensive subsurface data at extremely deep depths

114 via 2D/3D evaluations (Smith and Booker, 1991; Simpson and Bahr, 2005; Bai et al., 2010; An  
115 et al., 2012; Fu et al., 2013; Hu et al., 2013; Wang et al., 2015; Wynn et al., 2016; Di et al., 2020;  
116 Zhang et al., 2021; Kouadio et al., 2023; Hasan et al., 2024). When compared to other  
117 geophysical research methods, CSAMT has several advantages, including being more affordable,  
118 responsive to rocks with low resistance, and easier to use in difficult topographic situations (An  
119 et al., 2016; Kouadio et al., 2020; Zhang et al., 2021). With a depth capability of up to one  
120 kilometer, CSAMT provides more comprehensive subsurface assessments than the majority of  
121 geophysical methods, including ERT (Zonge and Hughes, 1988; Hasan et al., 2024). Thus,  
122 CSAMT is an effective instrument for investigating the vastly different topographical features,  
123 and it works better when applied with empirically based methods.

124 Geophysical and aquifer characteristics are determined by the same structural  
125 heterogeneities and several factors, including type of rock, fault, weathering degree, fluid content,  
126 permeability, pore-spacing, fracture, lithology, saturation, and joints (Purvance and Andricevic,  
127 2000; Sinha et al., 2009; Sikandar and Christen, 2012; Hasan et al., 2021; Gao et al., 2024). For  
128 the hydrogeological characterization of subsurface rock mass units, a number of earlier  
129 researchers were able to successfully connect hydraulic data or lithological logs with geophysical  
130 parameters (De Lima and Niwas, 2000; Purvance and Andricevic, 2000; Chen et al., 2001; Sale,  
131 2002; Hubbard and Rubin, 2002; Niwas and De Lima, 2003; Singh, 2005; Slater, 2007; Soupios  
132 et al., 2007; Chandra et al., 2008; Sinha et al., 2009; Majumdar and Das, 2011; Niwas and Celik,  
133 2012; Sikandar and Christen, 2012; Nwosu et al., 2013; Attwa et al., 2014; Hasan et al., 2021;  
134 Oli et al., 2022; Rao et al., 2022; Asfahani, 2023; Gao et al., 2024). By establishing a useful  
135 connection involving electrical resistivity and the aquifer parameters (derived from drilling tests),  
136 resistivity methods can provide an alternate means of estimating hydraulic parameters. This



137 study is groundbreaking because it uses non-invasive geophysical technique to generate two and  
138 three dimensional K models in a very varied environment with several types of rocks and  
139 considerable depths. The proposed research will need the drilling of only a small number of  
140 boreholes at strategic locations across the project area. We can then assess the vast research field  
141 with a more reliable CSAMT study. Then, even in the absence of drilling tests, K may be  
142 determined throughout the entire investigated site by directly correlating geophysical and  
143 borehole data. By applying the resultant equations to the entire research region, two and three  
144 dimensional K models are produced. This strategy would cut down on the pricey boreholes  
145 required to achieve a comprehensive and detailed assessment of subsurface hydrogeological  
146 conditions.

147 Before this work, no one had ever attempted to estimate K in a context as heterogeneous  
148 as this, with a wide variety of rock types present at a depth of 1 kilometer, using either direct or  
149 indirect approaches. Never before has a geophysical approach been employed in hard rock  
150 exploration to acquire volumetric measurements of 2D/3D K. In addition, no other study has ever  
151 used the CSAMT approach to derive any hydraulic parameter as this one has. We bridge the gap  
152 between reliable hydraulic models and limited borehole data with our more accurate 2D and 3D  
153 K model estimates of complicated hydrogeological situations, outperforming previous  
154 investigations. We set out to do this study primarily to: (1) quickly predict two and three  
155 dimensional K models using geophysical methods; (2) accurately estimate the hydrogeological  
156 characteristics of rock masses for groundwater evaluations at great depths in difficult geological  
157 contexts; (3) reduce expensive boreholes and make the most efficient use of scarce drilling  
158 resources in order to collect hydrogeological data over large area; (4) reduce uncertainties in

159 hydrogeological models and (4) encourage the use of non-invasive geophysical techniques for  
160 hard rock groundwater investigations as an alternative to expensive drilling.

## 161 **2. Study Area**

162 This study was carried out in the Jinji region of South China for deep groundwater  
163 exploration within a very diverse geological environment (Fig. 1). Precipitation at the study  
164 region is mostly concentrated in the summer due to its monsoon location; the annual  
165 precipitation totals 1965 mm. The Jinji region is surrounded by rivers and other bodies of water.  
166 Low, somewhat cut, and significantly depleted hills and mountains characterize the  
167 geomorphology of the project site. The northern landscape is somewhat lower in elevation than  
168 its southern counterpart. The area is renowned for several things: a variety of terrain slopes, from  
169 mild to steep, lush vegetation, and weathered mountain rocks at an elevation of 43 to 438 meters  
170 above sea level (Yang et al., 2021). Mounts Dashishan, Qilongding, and Jixinshan are among the  
171 most notable. The southern portion of the study site is home to the summit of Xikeng, which  
172 stands at 549.8 meters and serves as the highest point of the landscape. The northeast section of  
173 the site under investigation is traversed by the Yongkouwei River, which flows through it at an  
174 elevation of around 7.5 meters. The study area has a variety of geological formations and periods,  
175 including the Jurassic, Permian, Carboniferous, Devonian, and even some Paleogene layers, as  
176 well as intrusive rocks from the Indosinian, Caledonian, and Yanshanian periods. Hornstone,  
177 granite, and sandstone are the main lithologies that have been found (Fig. 1a). Due to the  
178 influence of magmatic processes and different structures, the complex Kaiping concave fault and  
179 fold systems formed the main geological characteristics in the project area (Qin, 2017). With the  
180 local tectonic line coinciding with the faults strike, primarily in the northeast orientation, the  
181 emergence of joint fissured features represents the numerous tectono-geological phases (Yang et

182 al., 2021). The location of the research area, which includes geophysical profiles, simplified  
183 geological conditions, and drilling tests, is shown in Fig. 1.

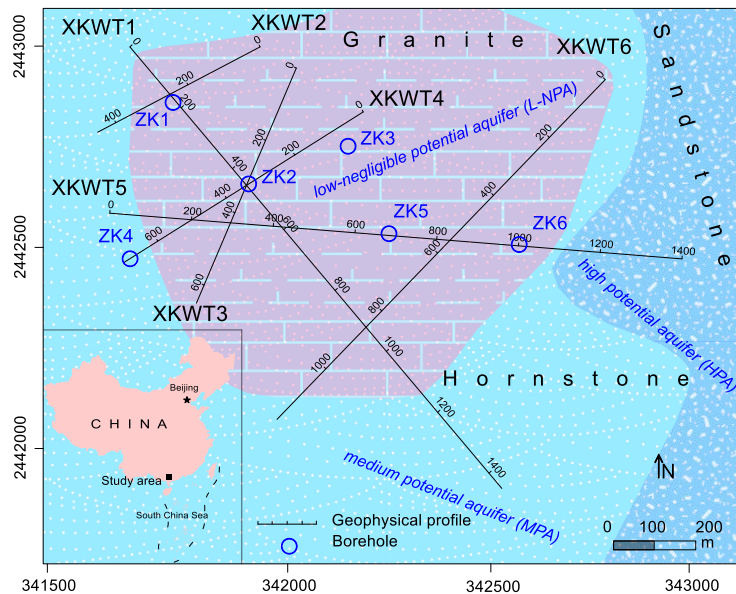

184  
185 **Fig. 1.** Project site location with a simplified geological background of granite, hornstone, and sandstone,  
186 six CSAMT profiles (black lines), and six boreholes (blue circles), including three potential aquifers  
187 namely high potential aquifer (HPA), medium potential aquifer (MPA), and low-negligible potential  
188 aquifer (L-NPA)

### 189 3. Methods

190 The current work attempted to estimate K for two and three dimensional assessment of  
191 groundwater resources throughout the project territory using available borehole data in  
192 conjunction with a non-invasive CSAMT approach. Fig. 2 is a flowchart that summarizes the  
193 main steps of this approach.

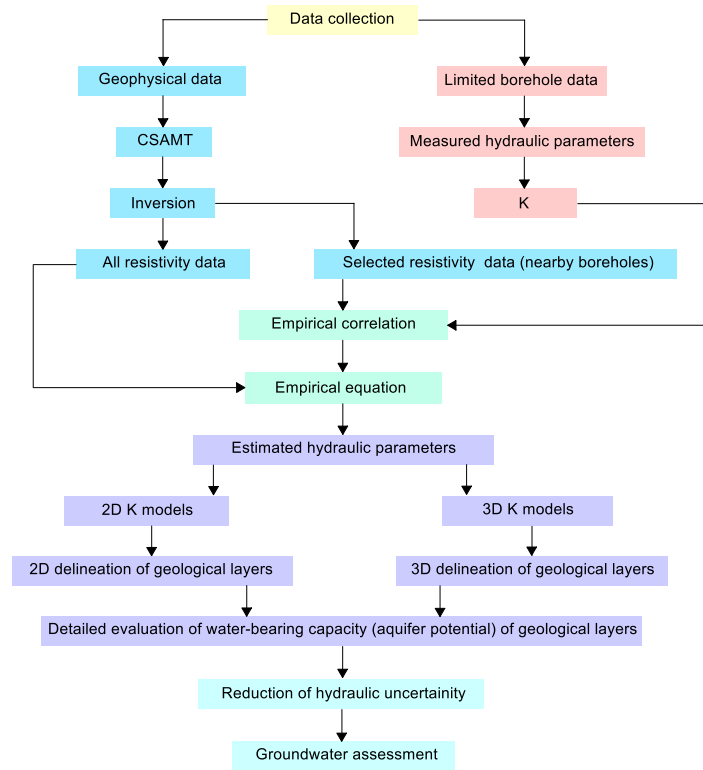

194

195 **Fig. 2.** Flowchart providing an overview of the proposed approach for obtaining 2D and 3D K models for  
 196 more precise and comprehensive evaluations of groundwater resources across extensive areas

197 *3.1. CSAMT survey*

198 The use of CSAMT in hard rock research is widespread (Simpson and Bahr, 2005; Bai et  
 199 al., 2010; An et al., 2012; Fu et al., 2013; Wang et al., 2015; Wynn et al., 2016; Di et al., 2020;  
 200 Zhang et al., 2021; Kouadio et al., 2023; Hasan et al., 2024). Such investigations involve the  
 201 controlled electric signals that are sent into the earth from the transmitter site, which is located  
 202 distant from the receiver, and the receiving station monitors the electric and magnetic fields  
 203 (Zonge and Hughes, 1988; Zhang et al., 2021). In a subsurface structure where different fields  
 204 have different propagation depths, a mathematical relationship exists between the reflected depth  
 205 and the frequency (Borah and Patro, 2019). Using the fact that different rocks have different

206 electrical conductivities, it monitors changes in the main field potential and magnetic field  
207 strength (Cagniard, 1953; Zonge and Hughes, 1988). The frequency components of the signal are  
208 obtained by applying Fourier transforms once the time series of the EM field variations has been  
209 grabbed (Simpson and Bahr, 2005). When doing CSAMT, an artificially controlled field source  
210 is used. It is possible to measure the electromagnetic field component of an electric dipole source  
211 with electrodes placed 1–2 kilometers apart. We can place the transmitter and any necessary  
212 connections between the batteries and the current electrodes. Field source transmitter-receiver  
213 distances are typically 5–10 km, depending on geological conditions and DOI (depth of  
214 investigation). One way to determine the resistivity of the subsurface is to divide the electric and  
215 magnetic field magnitudes by two orthogonal directions. A number of factors influence the  
216 subsurface geology-related resistivity, including fault fragmentation, water saturation,  
217 lithological changes in stratigraphic structures, pore fluid, porosity, and rock kinds (Fu et al.,  
218 2013; Zhang et al., 2021; Hasan et al., 2024). From 20 to 1000 meters below the surface,  
219 CSAMT can evaluate geological features with a vertical resolution of 5–20%. DOI is based on  
220 the subsurface resistivity and propagation frequency. Higher DOI is usually caused by greater  
221 resistivity and reduced frequency (Borah and Patro, 2019). The lateral resolution is contingent  
222 upon the station spacing, which generally ranges from 10 to 200 meters. A stronger received  
223 signal is achieved with larger station-spacing sizes (Simpson and Bahr, 2005). Use of a portable  
224 receiver allows for signal processing, amplification, filtering, and recording at each station.  
225 Electrode pairs, which consist of short grounded dipoles and magnetic-field sensors, are used to  
226 detect transmitted signals. The influence of radio transmitters, metal fences, power lines, and  
227 other obstacles on the accuracy of CSAMT data can be mitigated through well-planned surveys.

228 Possible representations of modeled resistivity data include plan, 3D, fence, and cross-sectional  
229 views.

230         Along six profiles (XKWT1–XKWT6), a total of 122 sounding stations and 5,825 meters  
231 of profile length were utilized to acquire CSAMT data. Every station was 50 meters away from  
232 the others. The DOI in the CSAMT survey was 1300 meters. Scalar measurements were taken  
233 using the TM Mode. These measurements take the electric and magnetic fields in two directions:  
234 parallel to the measuring line and perpendicular to it. The measuring stations must be 50 m  
235 distant from the electrode and linked consecutively when conducting EMAP observations. Our  
236 setup included a 50 Hz linear filter and Gain mode X1. For 1 Hz, the emission current peaks  
237 between 12 and 18 A, while for 7680 Hz, it drops to between 2.6 and 4.5 A. For the purpose of  
238 gathering CSAMT data, a Phoenix, Canada-made V8 multifunction receiver with TXU-30  
239 transmitter was employed. An exclusively geophysical approach with transmission voltages up to  
240 1000 V, currents up to 20 A at 1000 V, and currents up to 40 A at 500 V can all be supported by  
241 the TXU-30 multi-function transmitter with a 30 kilowatt output. Deep exploration is a natural fit  
242 for this GPS-enabled transmitter because it works with standard domestic three-phase 220 volt  
243 alternators. A working frequency range of 1–7680 Hz was employed over 34 distinct frequency  
244 points. The V8 multifunction receiver can do more than just gather data; it can also keep tabs on  
245 the data from other secondary receiving units. In order to accomplish this, the primary receiver  
246 features three channels and three tracks. Transmitter and receiver distances varied between 9.3  
247 and 12.5 kilometers. In order to capture the electric field signals, the non-polarized electrode was  
248 employed. The AMTC-30 inductive sensor received the signals, which operates between 10,000  
249 Hz and 0.1 Hz and is designed for high-frequency AMT/CSAMT magnets. A tensor  
250 measurement was carried out at each site following the acquisition of two orthogonal electric

251 field components and three orthogonal magnetic field components. In this case, the data came  
252 from the US firm Trimble's GPS receiver (XH dual-frequency). We quantified the CSAMT lines  
253 of objects recognition with the help of the Hi-Tech V30GNSS RTK equipment. These days, with  
254 the use of GPS, pinpoint accuracy can reach sub-meter levels. Using the specified direction and  
255 distance, the computer determined and transmitted the coordinate values of every survey line and  
256 survey point to the GPS or RTK. Using either the RTK or GPS navigational capability, the  
257 survey lines' measuring points were located. Testing the points along the measurement lines for  
258 system quality within a 3–5% range revealed a pretty uniform distribution of inspection points.  
259 The following design requirements were met by the results of the system quality check: an RMS  
260 value below  $\pm 5\%$ , an error tolerance of adjacent points on the profile of less than 10, a relative  
261 elevation tolerance of 1.67mm, and a plane tolerance of 2.33mm. The data acquired was of  
262 exceptional quality because there was no human or electrical interference at the project location.  
263 By analyzing the CSAMT data, we were able to determine the site's features ([An et al., 2012](#);  
264 [Hasan et al., 2024](#)). After the skewed data was removed, a curve analysis was carried out.  
265 Geological information and curve analysis were used to make the static corrections, which were  
266 done using a Hanning window spatial filtering method. So, having high-quality geophysical data  
267 made it easier to get correct data processing and interpretation.

268 The CMTPro Version software developed by Canadian Phoenix was employed for the  
269 data processing phase ([Phoenix Geophysics CMTPro, 2020](#)). Bad measuring point curves are  
270 removed, electrode coordinates are corrected, observed curves are automatically smoothed, CMT  
271 files are compiled from source current, reference track data, and V8 data, and files in the AVG  
272 format are generated, among other things, by this software. The 2D inversion ([Rodi and Mackie,](#)  
273 [2001](#); [Wang et al., 2015](#)) was executed using the CSAMT-SW algorithm, as shown in [Fig. 3](#),

274 which is a flow diagram of the algorithm ([Phoenix Geophysics CSAMT-SW, 2020](#)). These are  
275 the CSAMT-SW's key parts: 1. An AVG file to D format data conversion; 2. Changing and  
276 producing new CHK elevation files as well as importing existing ones into D files; 3. Inspecting  
277 the D file by hand for damaged sectors, interpolating them, erasing near-field data, and jumping  
278 to certain locations; 4. Various static correction approaches yielded inversion results that were  
279 nearly identical when compared; the D file was used for smoothing processing; 5. The four  
280 results (D files) of static correction for various correction processes are D, H, K, and Z; 6.  
281 Employing BOSTICK inversion and near-field correction to convert to text files; 7. By directly  
282 applying the CSAMT global field model (ID), which combines transition and near fields, to the  
283 measured data from CSAMT, quasi-2D inversion can be used to create finite (limited) layers  
284 with data representing resistivity in depth sections. For data in D file, we applied Bostick  
285 inversion ([Fusheng et al., 2022](#)) and saved the output as \* \_BOS.DAT and \* \_BSS.DAT,  
286 respectively. In addition, a newly produced \* \_M. DMT text file is used to hold the transformed  
287 data formatted in D files, in compliance with the requirements of the 2D inversion model of  
288 CSAMT. We utilize the inversion method to fit the derived models with the observed  
289 measurements after we reach the maximum number of iterations or the maximum RMS error,  
290 which in this study are 5 iterations. By utilizing the most suitable processing and inversion  
291 algorithms, the errors in the models were minimized, and a reliable 2D resistivity model ([Zhang  
292 et al., 2021](#)) of CSAMT was generated, taking into account the local geology and dataset  
293 peculiarities. Our understanding of the subsurface geological features was enhanced by the final  
294 inversion model, which demonstrated changes in resistivity.



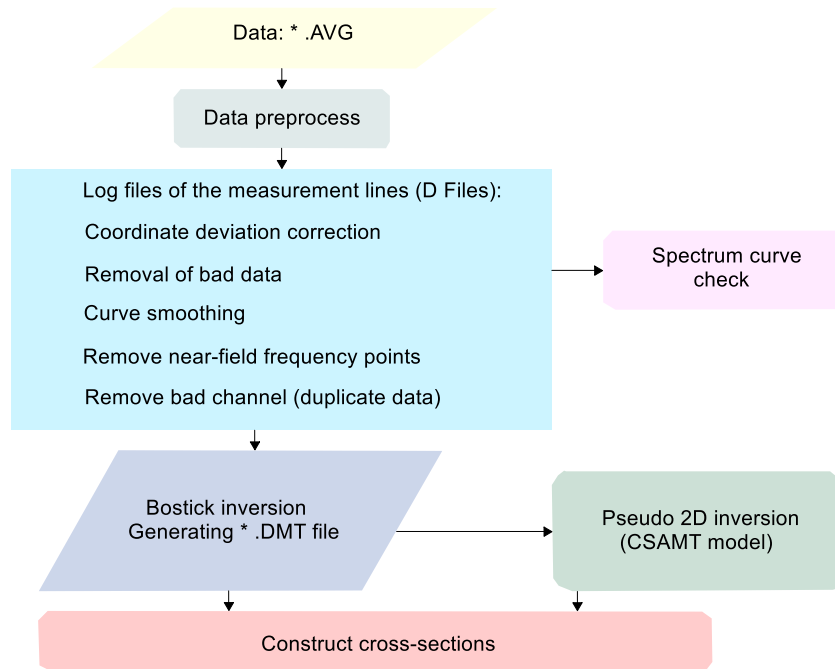

295

296 **Fig. 3.** Displaying the procedure of 2D inversion of CSAMT data by the use of Bostick inversion

297 *3.2. Estimation of hydraulic conductivity (K)*

298 In groundwater studies, hydraulic conductivity (K) is frequently employed to estimate the  
 299 amount of water that can be extracted from underground aquifers (Chandra et al., 2008;  
 300 Camporese et al., 2011; Niwas and Celik et al., 2012; Fu et al., 2015; Dewandel et al., 2017;  
 301 Trinh et al., 2018; Minutti et al., 2020; Leal et al., 2023; Cui et al., 2024). Traditionally, costly  
 302 borehole experiments are used to determine hydraulic conductivity, a crucial aquifer  
 303 characteristic (Niwas and Celik et al., 2012; Hasan et al., 2021; Gao et al., 2024). Water's ability  
 304 to flow easily through rock mass's pore spaces or cracks is known as hydraulic conductivity. A  
 305 number of elements influence hydraulic conductivity (K), such as the amount of fluid present,  
 306 defects, saturation level, rock composition, faults, compaction, deformation, and joint and cracks  
 307 (Purvance and Andricevic, 2000; Sinha et al., 2009; Sikandar and Christen, 2012; Hasan et al.,  
 308 2021).

309           There is strong evidence of a correlation between geophysical and hydrological  
310 characteristics, according to numerous researchers (Sale, 2002; Hubbard and Rubin, 2002; Niwas  
311 and De Lima, 2003; Slater, 2007; Soupios et al., 2007; Sinha et al., 2009; Majumdar and Das,  
312 2011; Sikandar and Christen, 2012; Attwa et al., 2014; Oli et al., 2022; Rao et al., 2022;  
313 Asfahani, 2023; Gao et al., 2024). The process of these correlations begins with the  
314 determination of hydraulic conductivity from drilling data at specific point-locations. Then, the  
315 empirical equations are obtained by integrating the hydraulic conductivity from boreholes with  
316 electrical resistivity from geophysical data. Next, hydraulic conductivity for the entire researched  
317 site is determined by applying all resistivity values from six profiles to the resulting equation.  
318 This allows for a determination of hydraulic conductivity over the entire site, even in cases when  
319 a borehole cannot be accessed. Previous empirical geophysical methods mostly utilized VES  
320 (vertical electrical sounding) for 1D prediction of hydraulic conductivity, predominantly in  
321 homogeneous environments at shallow depths. Consequently, deep groundwater investigation  
322 using K had not been previously conducted, particularly in hard rock formations. Consequently,  
323 our recent research first time ever employed a CSAMT-based empirical approach to estimate two  
324 and three dimensional K across an extensive area characterized by varied rock formations at  
325 large depths.

326           In the first step, 37 measurements from six boreholes (ZK1, ZK2, ZK3, ZK4, ZK5, and  
327 ZK6) were collected at various depths between 10 and 200 meters (Fig. 4a). 6 K values (2.6, 1.8,  
328 0.91, 0.82, 0.64, and 0.41 m/d) were derived from ZK1 at depths of 25, 65, 115, 140, 170, and  
329 200 m. At depths of 10, 35, 60, 100, 130, 165, 185, and 200 meters, eight K values (i.e., 1.5, 0.95,  
330 0.85, 0.76, 0.7, 0.47, 0.38, and 0.24 m/d) were derived from ZK2. Six K values (i.e., 0.96, 0.9,  
331 0.77, 0.6, 0.3, and 0.05 m/d) were derived from ZK3 at depths of 10, 40, 85, 120, 150, and 200 m.

332 At depths of 25, 85, 150, and 200 meters, four K values (i.e., 22, 14, 2.2, and 0.99 m/d) were  
333 derived from ZK4. Seven K values (i.e., 0.97, 0.93, 0.79, 0.72, 0.61, 0.5, and 0.39 m/d) were  
334 derived from ZK5 at depths of 10, 30, 60, 100, 135, 175, and 200 m. And, six K values (i.e., 15,  
335 10, 5.5, 2.18, 0.96, and 0.88 m/d) were derived from ZK6 at depths of 10, 45, 80, 120, 150, and  
336 200 m. The second stage involves: 37 CSAMT-derived observations (i.e., 6 values from 5<sup>th</sup>  
337 sounding XKWT1-5 along CSMAT profile XKWT1 at 200 m distance: 486, 582, 782, 915, 1080,  
338 and 1472  $\Omega\text{m}$ ; 8 values from 8<sup>th</sup> sounding XKWT3-8 along geophysical profile XKWT3 at 350  
339 m distance: 610, 756, 863, 973, 1035, 1354, 1490, and 1775  $\Omega\text{m}$ ; 6 values from 2<sup>nd</sup> sounding  
340 XKWT4-2 along surveyed line XKWT4 at 50 m distance: 735, 802, 942, 1186, 1661, and 2654  
341  $\Omega\text{m}$ ; 4 values from 15<sup>th</sup> sounding XKWT4-15 along CSAMT profile XKWT4 at 700 m distance:  
342 75, 163, 537, and 710  $\Omega\text{m}$ ; 7 resistivity values from 15<sup>th</sup> sounding XKWT5-15 along geophysical  
343 line XKWT5 at 700 m distance: 716, 792, 879, 1021, 1157, 1310, and 1490  $\Omega\text{m}$ ; 6 values from  
344 21<sup>st</sup> sounding XKWT5-21 along profile XKWT5 at 1000 m distance: 142, 223, 326, 535, 721,  
345 and 821  $\Omega\text{m}$ ) in line with the measured K (obtained from drill tests) were acquired at the  
346 aforementioned depth (Fig. 4a). In the third stage, the empirical integration of the picked  
347 observations (37 data sets) of CSAMT-based resistivity and borehole-based K was used to derive  
348 the following equation (Fig. 4b):

$$349 \quad K = 47194(\rho)^{-1.617} \quad (1)$$

350 where K is the hydraulic conductivity, measured in m/d units, and  $\rho$ , represented in  $\Omega\text{m}$ , denotes  
351 the true or inverted resistivity. Eq. (1) was utilized to predict the hydraulic conductivity (K) over  
352 entire area using an extensive resistivity data from six geophysical surveyed lines. By this way,  
353 we were able to estimate the water-retaining ability of three rock types (granite, hornstone, and  
354 sandstone) for a comprehensive evaluation of groundwater resources across three potential

355 aquifers (low-negligible potential aquifer (L-NPA), medium potential aquifer (MPA), and high  
356 potential aquifer (HPA)) throughout the entire study area with 0–1300 m depth. Lastly, the K  
357 parameter, a predicted hydrogeological feature that stretches throughout all XKWT1–XKWT6  
358 geophysical profiles, was modeled in two and three dimensions using the Geosoft and SKUA-  
359 GOCAD software programs ([Webring, 1981](#); [Mira Geoscience Ltd, 1999](#); [Hasan et al., 2024](#)).

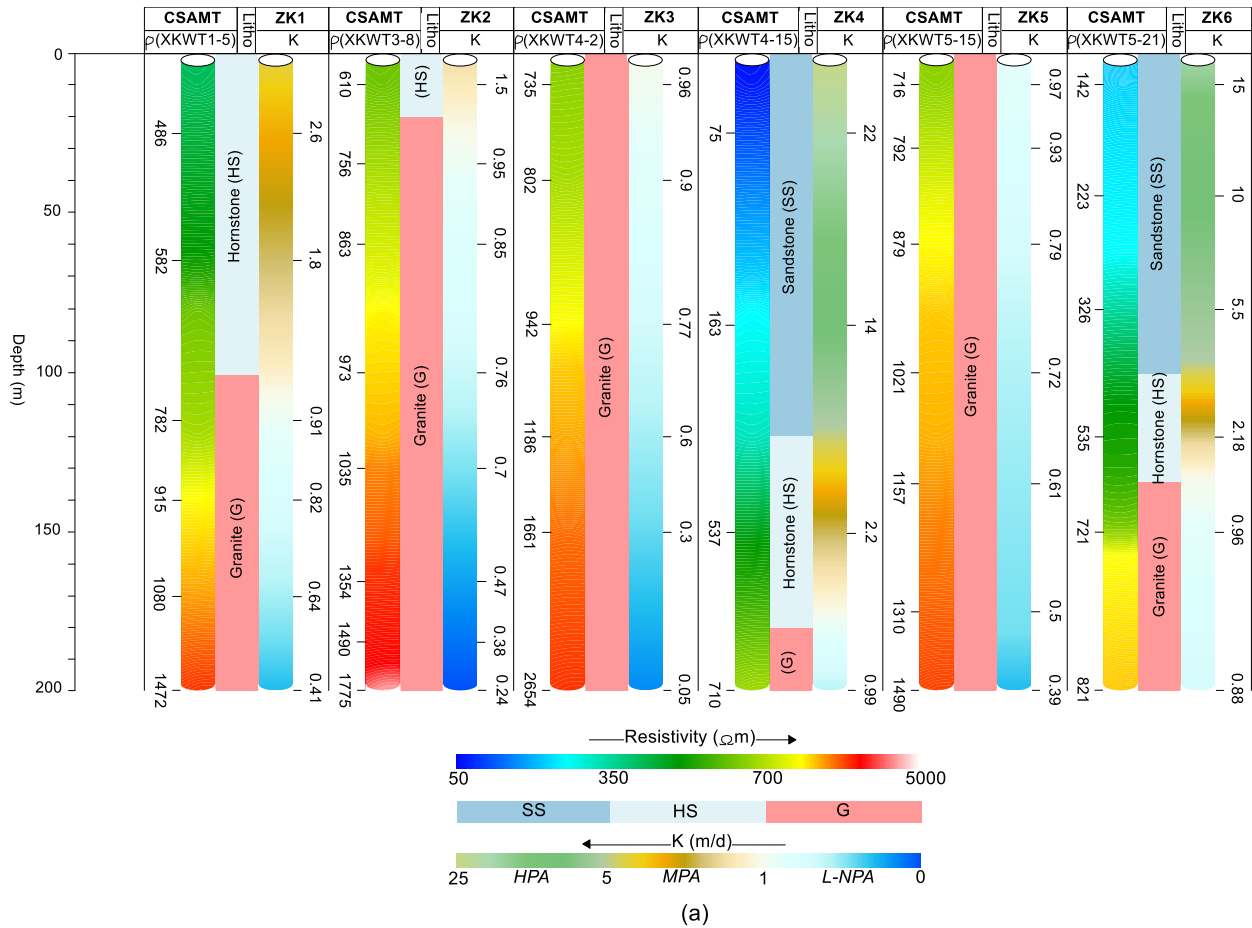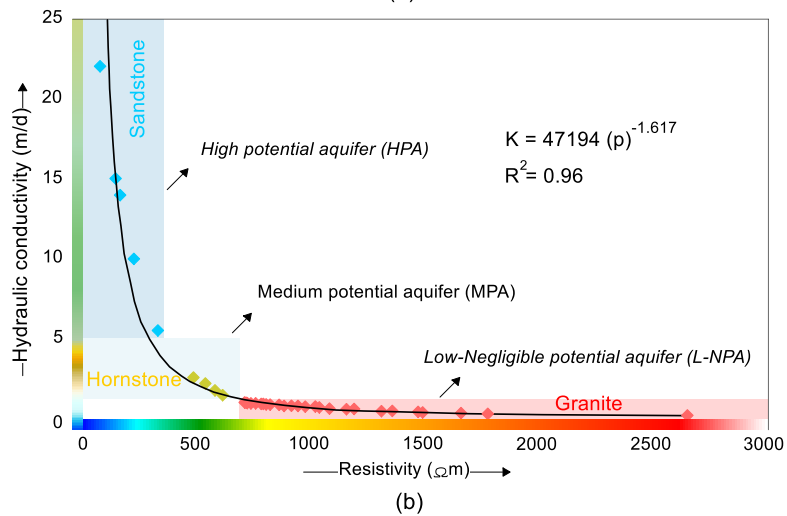

360

361 **Fig. 4.** (a) The presentation includes 37 resistivity-K data points at depths ranging from 10 to 200 m,  
 362 derived from 6 drilled tests (ZK1–ZK6) and corresponding resistivity ( $\rho$ ) measurements from CSAMT  
 363 soundings. The soundings are identified as follows: XKWT1-5 for sounding number 5 along profile  
 364 XKWT1, XKWT3-8 for sounding 8 along profile XKWT3, XKWT4-2 for sounding 2 along profile

365 XKWT4, XKWT4-15 for sounding 15 along profile XKWT4, XKWT5-15 for sounding 15 along profile  
366 XKWT5, and XKWT5-21 for sounding number 21 along profile XKWT5. Different rocks include  
367 hornstone (HS), sandstone (SS), and granite (G); **(b)** Using a total of 37 data points, the geophysical-  
368 borehole correlation for the predicted K

## 369 **4. Results**

### 370 *4.1. Geophysical-borehole correlation*

371 The combined data from six CSAMT profiles and six boreholes, which were used to  
372 divide the subterranean formation into several different geological strata according to the various  
373 ranges of hydraulic conductivity (K) and electrical resistivity, is displayed in [Table 1](#). The  
374 subsurface hydrogeological models were constructed using data from the CSAMT-based  
375 resistivity and borehole-based K and the geological settings of the study area. These models  
376 include three distinct geological layers, namely hornstone, sandstone, and granite. The following  
377 conditions were taken into account when evaluating sandstone, hornstone, and granite: sandstone  
378 with a resistivity below 350  $\Omega\text{m}$  and a K range of 5 to 25 m/d, hornstone with a resistivity that  
379 goes from 350 to 700  $\Omega\text{m}$  and K ranges from 1 to 5 m/d, and granite with a resistivity over 700  
380  $\Omega\text{m}$  and a K range of 0 to 1 m/d. We rated the different aquifer potential zones in the subsurface  
381 hydrogeological model as follows: sandstone has a high potential aquifer (HPA), hornstone  
382 contains a medium potential aquifer (MPA), and granite includes a low to negligible potential  
383 aquifer (L-NPA). Sandstone indicates aquifers with the highest yields or rock masses with the  
384 best water-bearing capacities, while granite denotes rock masses with the lowest yields or rock  
385 masses with the worst water-bearing capacities. Accordingly, in the research region, sandstone  
386 presents the most favorable conditions for developing groundwater, while granite presents the  
387 worst cases for groundwater extraction.

388 **Table 1**

389 Using the distinct value ranges of electrical resistivity and hydraulic conductivity (K) to integrate them  
 390 for a thorough groundwater assessment in hard rock of various types

| Resistivity<br>( $\Omega\text{m}$ ) | K<br>(m/d) | Type of rock | Aquifer potential                        |
|-------------------------------------|------------|--------------|------------------------------------------|
| < 350                               | 5–25       | Sandstone    | High potential aquifer (HPA)             |
| 350–700                             | 1–5        | Hornstone    | Medium potential aquifer (MPA)           |
| >700                                | 0–1        | Granite      | Low-negligible potential aquifer (L-NPA) |

391 *4.2. 2D groundwater assessment*

392 Eq. (1), which is based on geophysical-borehole correlation (Fig. 4), efficiently  
 393 transforms two-dimensional CSAMT models into two-dimensional K models and displays the  
 394 results in Fig. 5. Using geophysical-based 2D K models, we can precisely and thoroughly assess  
 395 the groundwater resources in hard rock across the complete study area, 0–1300 meters deep, in  
 396 comparison to the limited drill tests (Fig. 6 and 7). For XKWT1 surveyed line, the following  
 397 geological layers have been delineated for groundwater assessment: A high potential aquifer  
 398 contained in sandstone was assessed at a distance of 240–380 meters and between 200 and 850  
 399 depths. The medium potential aquifer hold by hornstone was assessed for 0–240 m distance  
 400 within 0–395 m and 800–1300 m depth, for 240–530 m apart and 0–1300 m deep, for 1200–1300  
 401 m apart and 0–1300 m deep, for 1200–1450 m distance within 0–400 m and 800–1300 m depths.  
 402 Granite-related low potential aquifers were identified by distances of 0–290 m and depths of  
 403 300–800 m, 380–1220 m and depths of 0–1300 m, and 1300–1450 m and depths of 400–750 m.  
 404 The following is a description of the geological layers used for groundwater assessment along  
 405 profile XKWT2: No sandstone with significant aquifer potential was assessed along this profile.

406 Hornstone of moderate potential aquifer was defined in depths of 0–300 m and 850–1300 m  
407 within a distance of 200–450 m, at 0–200 m depth within 0–50 m distance, and at 800–1300 m  
408 depth within 0–200 m distance. This profile is predominantly characterized by granite of low  
409 potential yield, extending from 0 to 1300 meters in depth and 0 to 450 meters in distance. The  
410 characterization of geological strata for groundwater evaluation along profile XKWT3 is as  
411 follows: We looked at a high-potential groundwater in sandstone at distances of 0–150 m and  
412 depths of 0–250 m, 60–100 m and depths of 775–825 m, 450–510 m and depths of 0–170 m, and  
413 500–540 m and depths of 700–715 m. Hornstone with a medium possible yield was defined by  
414 profile lines that went from 0 to 540 meters apart and from 0 to 390 meters deep; from 650 to  
415 950 meters apart and from 1100 to 1300 meters deep; and from 350 to 650 meters apart and from  
416 700 to 1300 meters deep. One layer of granite rock with a depth of 0–800 meters at a distance of  
417 0–650 meters, and another layer with a depth of 850–1250 meters at a distance of 0–400 meters,  
418 is used to assess the low potential aquifer. Profile XKWT4's geological layer delineation for  
419 groundwater assessment is as follows: High aquifer yield sandstone was assessed at a depth of 0–  
420 280 meters and a distance of 650–700 meters. Medium aquifer yield hornstone was defined at  
421 600–900 m depth and 0–150 m distance, 430–500 m distance and 0–150 m depth, and 400–650  
422 distance and 500–1300 m depth. One granite layer with a depth of 0–850 meters at a distance of  
423 0–700 meters and another granite layer with a depth of 900–1300 meters at a distance of 0–400  
424 meters are used to assess the low aquifer yield found within granite. The following is a  
425 description of the geological layers used for groundwater assessment along profile XKWT5:  
426 High potential sandstone was analyzed at distances of 0–190 m and depths of 0–1200 m, 910–  
427 1060 m and depths of 0–200 m, and 1065–1400 m and depths of 500–1300 m. Medium yield  
428 hornstone was primarily identified by distances of 175–380 m and depths of 650–1300 m, 390–



429 800 m and depths of 600–1000 m, 800–1400 m and depths of 0–400 m, and 800–1050 m and  
 430 depths of 400–1300 m. Granite of the low-yield aquifer is assessed for distances of 90–1010 m  
 431 and depths of 0–600 m, 1000–1300 m depth and 400–850 m distance, as well as 1100–1300 m  
 432 distance and 200–500 m depth. The geological layers for groundwater assessment along profile  
 433 XKWT6 are delineated as follows: No sandstone has been assessed along this profile. Hornstone  
 434 of medium potential aquifer is evaluated at 0–100 m distance between 0–350 m depth, 350–500  
 435 m distance for 0–360 m depth, 345–655 m distance between 450–850 m depth, 400–520 m  
 436 distance from 1100 to 1300 m depth, 590–800 m distance with 0–280 m depth, and 980–1150  
 437 distance for 0–360 m depth. Low-yield granite predominantly characterizes this profile at depths  
 438 of 0–1300 m and distances of 0–1150 m. The findings from the integrated 2D K models  
 439 illustrated in Fig. 6 and 7 point out that the aquifer-bearing capacity of geological rock units  
 440 generally rises with depth, predominantly exhibiting medium to high potential aquifers in the  
 441 eastern, western, and partially southern regions, while the central areas exhibit the least or worst  
 442 occurrence of groundwater resources.

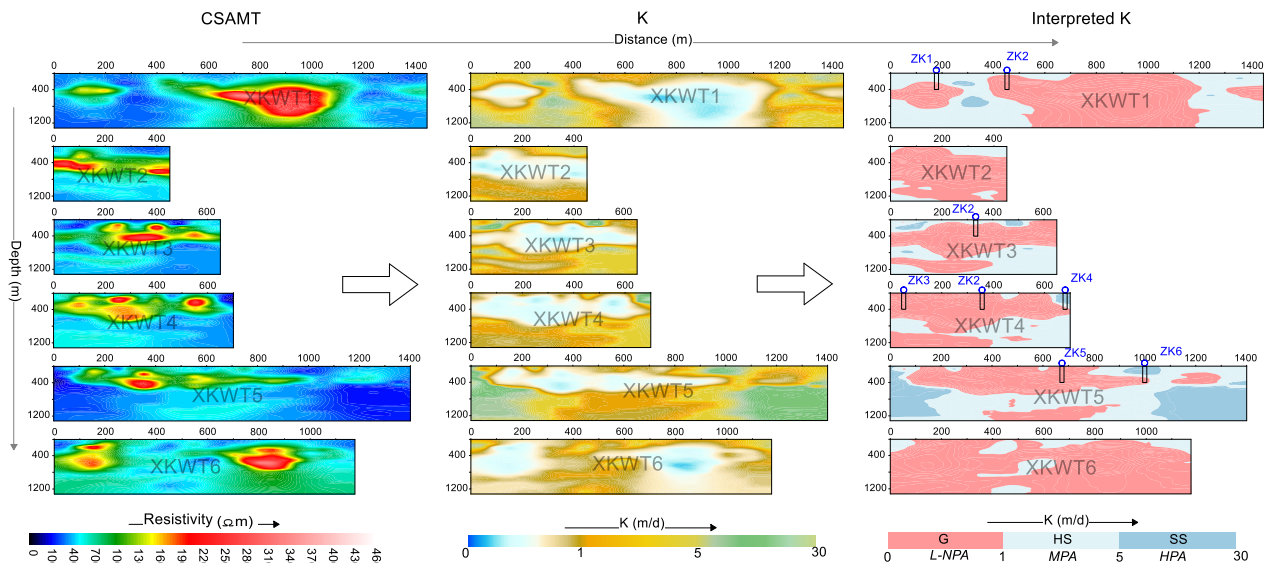

443

444 **Fig. 5.** The conversion of 2D CSAMT models (for six profiles XKWT1–XKWT6) into 2D K models and  
 445 the interpretation of these 2D K models, using geophysical-borehole correlation, enable groundwater  
 446 evaluation through high potential aquifer (HPA), medium potential aquifer (MPA), and low-negligible  
 447 potential aquifer (L-NPA) connected to sandstone (SS), hornstone (HS), and granite (G), respectively

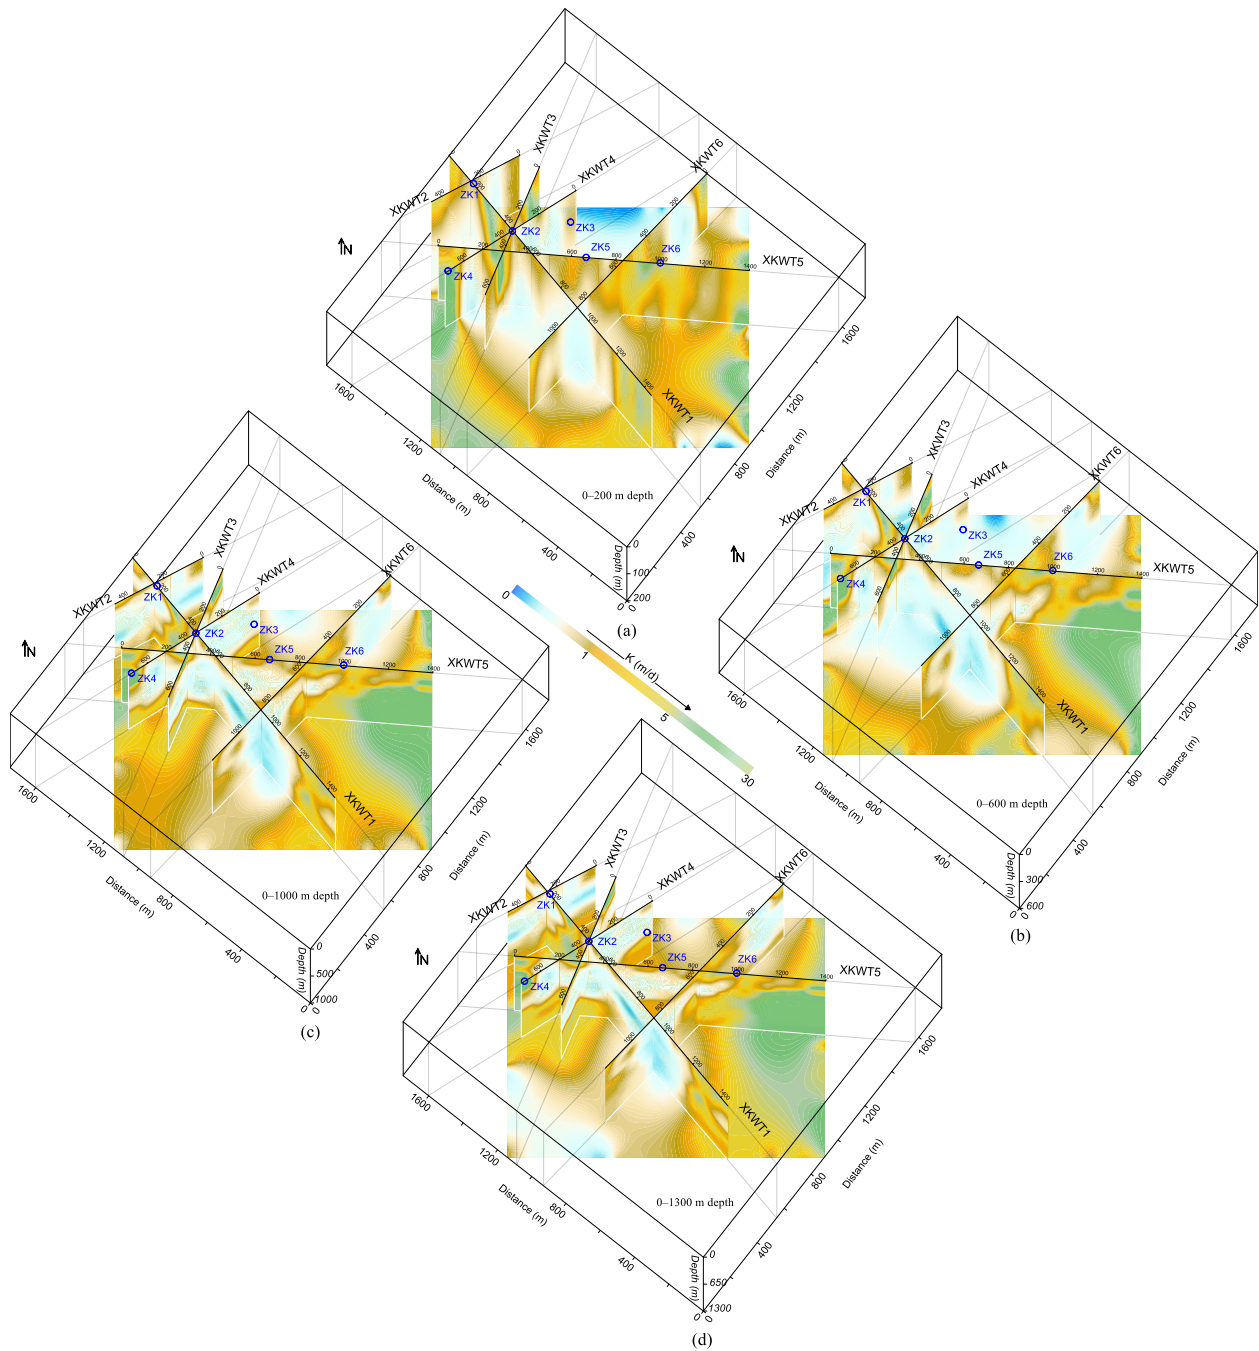

448

449 **Fig. 6.** The integrated 2D K models obtained from geophysical-drilling incorporation (K indicated on a  
 450 color bar ranging from blue to grey) for (a) 0–200 m depth, (b) 0–600 m depth, (c) 0–1000 m depth, and  
 451 (d) 0–1300 m depth

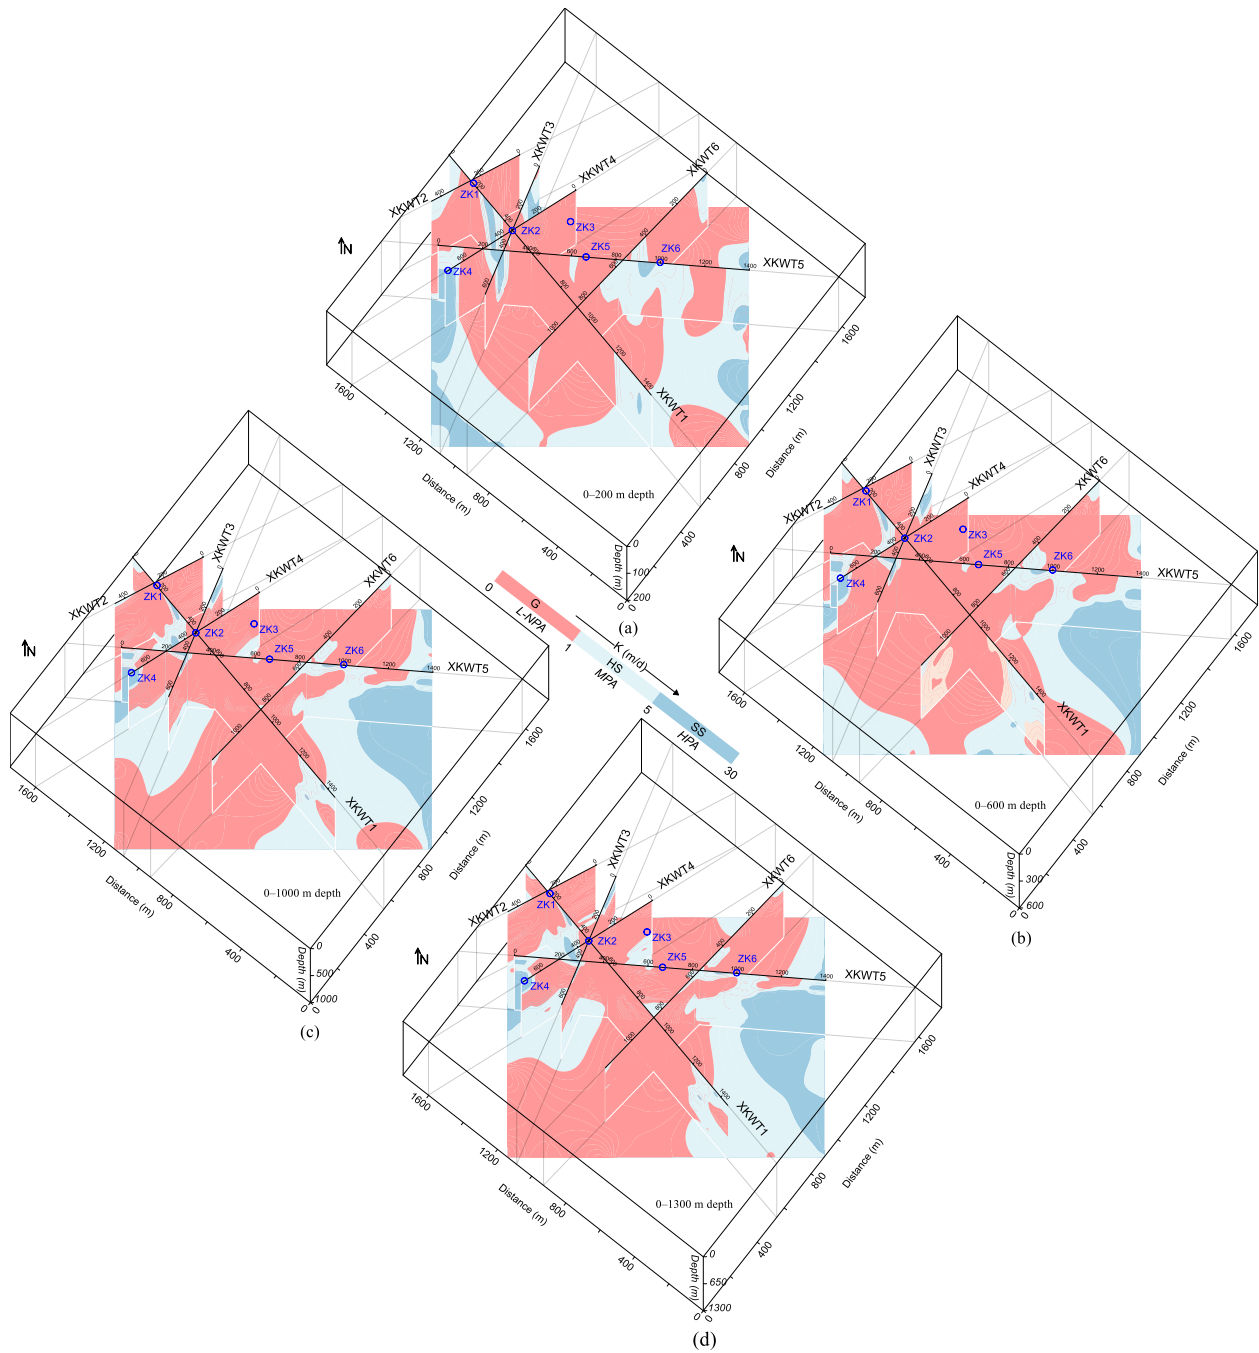

452

453 **Fig. 7** Interpretation of 2D K models (obtained from specific K ranges) for three groundwater potential  
454 aquifers: low-negligible potential aquifer (L-NPA); medium potential aquifer (MPA); high potential  
455 aquifer (HPA), linked to three geological strata: granite (G), hornstone (HS), and sandstone (SS),  
456 respectively, at depths of (a) 0–200 m, (b) 0–600 m, (c) 0–1000 m, and (d) 0–1300 m

#### 457 *4.3. 3D groundwater assessment*

458 A comprehensive evaluation of the water-bearing capacity of rock mass for groundwater  
459 assessment was accomplished by the 3D K external visualization illustrated in Fig. 8 (a, b).  
460 Granite of low potential aquifer was assessed at the ground surface along profile XKWT1 at  
461 distances of 400–500 m and 700–1100 m, along profile XKWT2 at 50–200 m, along profile  
462 XKWT3 at 0–30 m, 200–250 m, 350–450 m, and 600–650 m, along profile XKWT4 at distances  
463 of 0–420 m and 500–600 m, along profile XKWT5 at distances of 120–210 m, 290–815 m, and  
464 1150–1300 m, and along profile XKWT6 at distances of 100–500 m and 800–1000 m. Medium  
465 aquifer yield within hornstone was identified along profile XKWT1 at distances of 0–400 m,  
466 500–695 m, and 1100–1450 m; XKWT2 at 0–50 m and 200–450 m; XKWT3 at 30–220 m, 250–  
467 350 m, 400–450 m, and 500–550 m; along profile XKWT4 at 420–500 m and 600–650 m; along  
468 profile XKWT5 at 0–120 m, 200–220 m, 260–280 m, 590–610 m, 800–910 m, 1060–1150 m,  
469 and 1300–1400 m; and along profile XKWT6 at 0–100 m, 500–800 m, and 1000–1150 m. The  
470 sandstone with significant aquifer potential was evaluated in various locations, including profile  
471 XKWT1 at 250–300 m, profile XKWT3 at 430–500 m, profile XKWT4 at 650–700 m, profile  
472 XKWT5 at both 250–300 m and 900–980 m, and profile XKWT6 at 0–30 m. A low-potential  
473 aquifer of granite predominates on the surface, especially in the center. The remaining regions  
474 are assessed based on the medium potential aquifer of hornstone. Sandstone with high aquifer  
475 production is assessed in limited areas encircled by hornstone

476 [Fig. 8](#) (c, d) provides a thorough analysis of the rock mass's water-bearing capacity for  
477 groundwater assessment using a 3D K internal viewpoint. At a subterranean depth of 1300 m, a  
478 low aquifer yield of granite was evaluated using profile XKWT1 over a distance of 550–1180 m,  
479 profile XKWT2 over 0–100 m, profile XKWT3 over 0–110 m, profile XKWT4 over 0–400 m,  
480 profile XKWT5 over 400–800 m, and profile XKWT6 over distances of 0–400 m and 550–1150  
481 m. The medium aquifer yield within hornstone was delineated by profile XKWT1 at distances of  
482 0–550 m and 1200–1450 m, profile XKWT2 at 100–450 m, profile XKWT3 at 70–650 m, profile  
483 XKWT4 at 350–705 m, surveyed line XKWT5 at 200–405 m and 850–1050 m, and XKWT6 at  
484 400–550 m. The high-potential aquifer contained within sandstone was assessed exclusively  
485 along profile XKWT5 at distances 0–200 m and 1000–1400 m. Medium to high potential  
486 aquifers, at 1300 m depth, predominantly occupy the eastern and western regions, while the  
487 center portions are primarily characterized by low potential aquifers. [Fig. 8](#) presents the findings  
488 of the 3D K analysis, revealing that the interior predominantly consists of granite with minimal  
489 aquifer yield. The water-retaining capacity of the rock mass increases when viewed from above.  
490 This facilitates an accurate appraisal of the water-bearing capacity of geological layers for  
491 comprehensive groundwater evaluation using 3D K modeling.

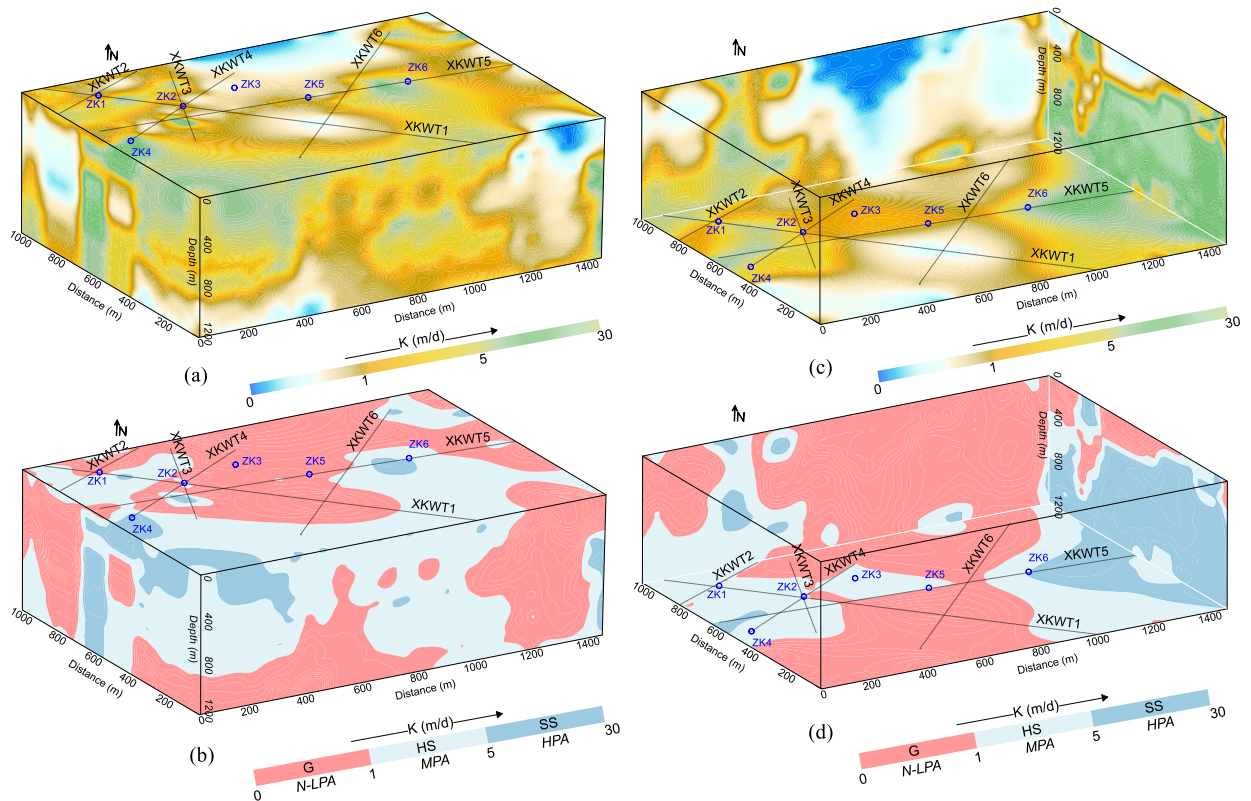

492

493 **Fig. 8.** The 3D K models derived from the correlation of CSAMT and borehole data (with K displayed on  
 494 a color scale transitioning from blue to grey) for three groundwater potential aquifers: low-negligible  
 495 potential aquifer (L-NPA); medium potential aquifer (MPA); high potential aquifer (HPA), linked to three  
 496 geological strata: granite (G), hornstone (HS), and sandstone (SS), respectively, for (a) The outside view  
 497 of 3D K model, (b) Analysis of the 3D (external perspective) K model, (c) The inner outlook of 3D K  
 498 model, and (d) Analysis of the 3D (internal perspective) K model

499 *4.4. Groundwater assessment via depths and 2D/3D insights*

500 Given the limited data collected from boreholes, the water-bearing capacity of rock  
 501 masses below 200 m depth cannot be evaluated using the observed K (borehole-based K). An  
 502 efficient, precise, and comprehensive evaluation of hard rock groundwater resources was  
 503 achieved by establishing a strong correlation between drilling and CSAMT data. This allowed

504 for the determination of K up to depths of 1300 m, while also saving time. As shown in [Fig. 9](#),  
505 predicted K values at depths of 0, 300, 600, 900, and 1300 m were obtained by 2D/3D  
506 groundwater yield insights. The following were the criteria for evaluating groundwater at a depth  
507 of 1300 meters: Granite, which makes up almost half of the subsoil in areas with low potential  
508 aquifer, is evaluated in the southwest and central regions. Hornstone, which made up 28% of the  
509 medium potential aquifer, was investigated in the western and eastern parts around the granite  
510 formation. Nearly a quarter of the subsurface assessments in the eastern region were carried out  
511 on high-yield sandstone. The following criteria were utilized to gain an understanding of the  
512 subsurface for groundwater evaluation at a depth of 900 m: Sandstone made up 21% of the high-  
513 potential-aquifer subsoil in the eastern areas. The eastern and western regions revealed 27%  
514 hornstone of a medium potential aquifer surrounding granite. The subsurface, which had a low  
515 aquifer yield, was 52% granite, with boundaries in the center, north, and southwest. At 600  
516 meters below the surface, we used these criteria to interpret the hydrogeological conditions: In  
517 the central, northern, and western areas, 55% of the subsurface was found to be a low-yielding  
518 aquifer of granite; in the southwestern and eastern areas, hornstone was more prevalent, making  
519 up 25% of the subsurface and suggesting a medium-yielding aquifer; and in the eastern regions,  
520 sandstone was mostly studied, making up 20% of the subsoil and suggesting a high-yielding  
521 aquifer. These criteria were utilized to analyze the hydrogeological conditions at a depth of 300  
522 meters: In the central and northwest sections, granite with a low potential aquifer made up 63%  
523 of the total. In the southern and southeastern regions, hornstone with a medium yield aquifer  
524 made up 27% of the underground. In the southwestern and eastern areas, sandstone with a high  
525 potential aquifer, accounting for 10% of the subsoil, was studied. The hydrogeological  
526 conditions shown below were ascertained from the surface at a depth of 0 m: In the northern and

527 central regions, 65% of the subsurface is composed of granite, while 26% of the surface is  
 528 hornstone and contains a medium-potential aquifer. The sandstone, which is mostly found in the  
 529 inner and southwestern regions, is examined on 9% of the surface and contains a high-potential  
 530 aquifer. As seen in Fig. 9, the thickness of low yield aquifer granite diminishes as one move  
 531 downwards. The conditions for the occurrence of groundwater are worst in the middle parts,  
 532 dropping down to 600 or 700 m. Rock masses with significant potential aquifer, particularly  
 533 below 700 m depth, are located in the western and eastern regions.

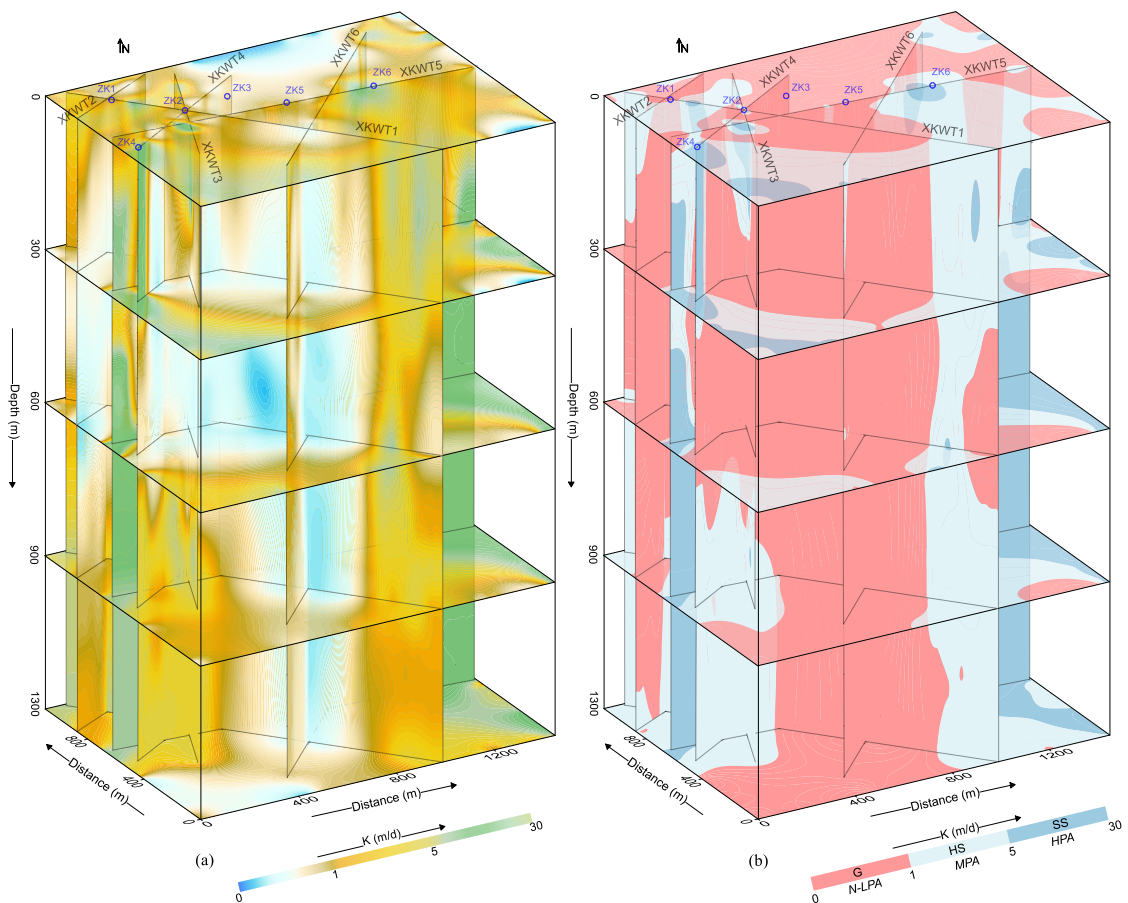

534  
 535 **Fig. 9.** (a) In 2D and 3D perspectives of groundwater occurrence, K on a color bar that increases from  
 536 blue to grey represents geophysical-based K imaging at different depths (0, 300, 600, 900, and 1300 m),  
 537 (b) Analysis of geophysical-derived K (utilizing specific K ranges) at varying depths via 2D and 3D



538 insights for fresh granite (G) of low-negligible potential aquifer (L-NPA), hornstone (HS) of medium  
539 potential aquifer (MPA), and sandstone (SS) of high potential aquifer (HPA)

#### 540 *4.5. Comparison of the predicted and measured K*

541 The K derived using CSAMT provides an accurate and methodical assessment of water-  
542 bearing yield for groundwater evaluation throughout the project area. The K results (Fig. 5–9)  
543 indicate that granite is analyzed in the central parts; hornstone is largely identified between  
544 granite and sandstone in the eastern, southern, and western regions. In the eastern regions,  
545 sandstone is thoroughly analyzed, whereas in the western sections, it is partially appraised. Data  
546 collected from boreholes produce incompatible mapping of subsurface geological layers, which  
547 makes it difficult to assess the water-bearing capacity of rock masses. The drilling results do  
548 coincide with the CSAMT K in a small number of locations at depths of 200 meters near the  
549 drills. Consequently, groundwater potential assessments across large regions are rendered  
550 imprecise by measured K (obtained via drills), in comparison to the predicted K.

551 Table 2 shows the %matching for the selected measurements, which were determined by  
552 comparing the drill-K with the CSAMT-K. For a few chosen data points, we compared the  
553 predicted K with the borehole-based K and found the following percentage matching: Applying  
554 Eq. (1) for depths of 25 m and 115 m, respectively, yields a %matching of 81 and 92 when ZK1  
555 (well number one) is empirically coupled to XKWT1-5 (5<sup>th</sup> sounding along CSAMT profile  
556 XKWT1). A percentage matching of 100 and 90, at 10 and 130 m depth, respectively, are  
557 produced by the combination of XKWT3-8 (sounding number 8 of XKWT3) and ZK2 (well  
558 number two). The integration of ZK3 (well number three) with XKWT4-2 (second sounding on  
559 line XKWT4), at depths of 85 and 150 meters, results in matching percentages of 95 and 97,  
560 respectively. The amalgamation of ZK4 (well number four) and XKWT4-15 (15<sup>th</sup> sounding of

561 XKWT4) results in matching percentages of 67 and 86, at respective depths of 25 and 85 meters.  
 562 The integration of well number five (ZK5) and the fifteenth sounding at line XKWT5 (XKWT5-  
 563 15) produces %matching of 96 and 92, respectively, at depths of 60 and 200 m. In addition,  
 564 a %matching of 75 and 84, with depths of 80 and 120 m respectively, are produced by  
 565 combining ZK6 (well number six) and XKWT6-21 (21<sup>st</sup> sounding at XKWT6). A lesser degree  
 566 of error or strong matching is shown by the aforementioned comparison between the obtained  
 567 and predicted K. The comparison also shows that, even for data points with poor %matching,  
 568 predicted and observed K values typically fall into the same aquifer potential zone.

569 **Table 2**

570 The percentage matching between the drill-K and the CSAMT-K for the selected measurements

| CSAMT data points (selected) |                                  |                                  | Drilling data |           |                  | %Matching |
|------------------------------|----------------------------------|----------------------------------|---------------|-----------|------------------|-----------|
| CSAMT sounding number        | Resistivity ( $\Omega\text{m}$ ) | Predicted K' (m/d) using Eq. (1) | Borehole name | Depth (m) | Measured K (m/d) | K' vs K   |
| XKWT1-5                      | 486                              | 2.1                              | ZK1           | 25        | 2.6              | 81        |
| XKWT1-5                      | 782                              | 0.99                             | ZK1           | 115       | 0.91             | 92        |
| XKWT3-8                      | 610                              | 1.5                              | ZK2           | 10        | 1.5              | 100       |
| XKWT3-8                      | 1035                             | 0.63                             | ZK2           | 130       | 0.7              | 90        |
| XKWT4-2                      | 942                              | 0.73                             | ZK3           | 85        | 0.77             | 95        |
| XKWT4-2                      | 1661                             | 0.29                             | ZK3           | 150       | 0.3              | 97        |
| XKWT4-15                     | 75                               | 33                               | ZK4           | 25        | 22               | 67        |
| XKWT4-15                     | 163                              | 12                               | ZK4           | 85        | 14               | 86        |
| XKWT5-15                     | 879                              | 0.82                             | ZK5           | 60        | 0.79             | 96        |
| XKWT5-15                     | 1490                             | 0.35                             | ZK5           | 200       | 0.38             | 92        |

|          |     |      |     |     |      |    |
|----------|-----|------|-----|-----|------|----|
| XKWT5-21 | 326 | 4.1  | ZK6 | 80  | 5.5  | 75 |
| XKWT5-21 | 535 | 1.83 | ZK6 | 120 | 2.18 | 84 |

---

571

572 **5. Discussion**

573         The application of geophysical technologies is increasingly prevalent in groundwater  
574 research. Previous investigations indicated that groundwater evaluation could benefit from  
575 integrating geophysical and drilling data. The water-bearing potential of a rock mass can be  
576 estimated using a number of hydraulic characteristics. Hydraulic conductivity (K), typically  
577 evaluated via boreholes, is the most reliable and practical hydraulic parameter utilized in  
578 groundwater assessments. This study is the first to employ geophysical approaches to indirectly  
579 acquire 2D/3D K at depths greater than 1 km in a context with a wide diversity of rocks.

580         In this paper, we present CSAMT, a new geophysical approach for more accurate  
581 groundwater evaluation in the lack of adequate borehole data, by evaluating the water-bearing  
582 capacity of rock masses. It opens the door to a thorough evaluation of deep hard rock  
583 groundwater using the predicted hydraulic parameter K. Based on the diverse topography of  
584 South China, our methodology offers a flexible empirical correlation using its huge geophysical  
585 dataset and sparse borehole data. The rocks and lithologies were classified according to a  
586 specific set of K values used in the aquifer models. The rocks are categorized into three groups  
587 according to distinct aquifer potential zones: fresh granite with a low-negligible potential aquifer  
588 (L-NPA), sandstone with a high potential aquifer (HPA), and hornstone with a medium potential  
589 aquifer (MPA) between the two potential aquifers. These computations are applicable in such  
590 specific geological conditions to determine the total water-bearing capacity of the rock formation,  
591 as they are based in resistivity-K measurements of hornstone, granite, and sandstone. Depending

592 on the local environment and the composition of the rock, the exact parameter ranges are  
593 determined. Based on the area hydrogeological circumstances, the exact rock mass class of a  
594 potential aquifer can be calculated using the well-established flexible equations. The proposed  
595 method allows for the derivation of generalized equations that are applicable in any geological  
596 setting. The K-resistivity range of a rock unit is relative and might vary from one location to  
597 another. In most cases, a solid empirical equation can be derived by drilling five or more  
598 boreholes across the entire area, each of which should have at least five measurements taken  
599 from the rock unit. Both the quantity of geophysical-borehole observations and the range of K-  
600 resistivity have a significant impact on the validity of the empirical equation. By incorporating  
601 more datasets into correlation analysis, K can be more accurately computed. According to [Table](#)  
602 [2](#), the majority of the datasets demonstrated an impressive level of accuracy with matching rates  
603 exceeding 80% between the actual and estimated K. Particularly for extremely low resistivity  
604 and high K values, the established equation gives poor matching between the predicted and  
605 observed K. For example, at a depth of 25 meters, there was only a 67% match between ZK4 and  
606 XKWT4-15; nonetheless, the calculated and predicted K values are in the same HPA zone.  
607 Throughout the project region, the resistivity-K ranges utilized for correlation analysis  
608 encompass all lithologies and rock types, including granite, hornstone, and sandstone. The  
609 positions of the boreholes may have been indicative of the rock unit features of the entire  
610 research site, which allowed for the reliable results to be acquired. Instead of applying one  
611 formula for evaluation of different geological layers, it might be more precise to utilize separate  
612 equations for each type of rock unit to determine K. Distinct equations, however, might be more  
613 effective while enough borehole data is available for each rock mass unit. The positions of  
614 surveyed lines are essential for the accuracy of the calculated K, as the anticipated K is derived

615 from this correlation. Because of this, two and three dimensional K models produce somewhat  
616 more accurate results in areas close to geophysical profiles compared to areas far from these  
617 profiles. When data from boreholes is not available, the resulting equation can be used to  
618 estimate K in similar geological settings.

619 CSAMT is widely used for investigating underground structures and to a considerable  
620 extent for mitigating the impact of weak natural signals. Nevertheless, resistivity measurements  
621 can be impacted by various elements, such as transmission devices, electrical lines, metal  
622 obstacles, etc., which can lead to ambiguous results and interpretations. This study shows,  
623 however, that with good CSAMT survey design, these effects can be reduced and reliable results  
624 can be obtained. The absence of electrical or human disturbance at the project site allowed for  
625 the collection of high-quality data. A K value of 30 m/d, which is equivalent to a resistivity of 27  
626  $\Omega\text{m}$ , indicated that the rock mass (sandstone) could hold the most water. Nonetheless, when the  
627 resistivity value was measured at 5000  $\Omega\text{m}$ , the rock mass (granite) was determined to have a  
628 minimum water-bearing capability of 0.05 m/d. In contrast to the drilling K, the geophysical K  
629 assesses the rock mass's water-bearing capacity more accurately and thoroughly while reducing  
630 variability in the expected hydrogeological model. As a result, hydrogeological models for  
631 groundwater assessment in extremely diverse hard rock are seriously doubted due to insufficient  
632 boring trials. However, geophysical techniques help bridge the gap between accurate  
633 hydrogeological models and inadequate borehole data.

## 634 **6. Conclusions**

635 Our research introduces novel approaches for employing non-invasive technology in deep  
636 groundwater studies. This research, first time ever, utilizes CSAMT to indirectly estimate two  
637 and three dimensional K values, evaluating the water-bearing capacity of rock masses for deep

638 groundwater assessment across extensive, heterogeneous hard rock regions without the need for  
639 drilling data. The predominant technique for assessing hydraulic parameters in groundwater  
640 research is the utilization of boreholes. Nonetheless, drilling techniques are expensive and  
641 possess significant drawbacks. This study provides a more comprehensive and accurate  
642 assessment of rock mass hydrogeological conditions than conventional techniques while  
643 requiring fewer boreholes. In order to evaluate the water-holding capacity of rock formations in  
644 different environments, we derived the flexible equation that determines K by analyzing  
645 CSAMT-drilling data from numerous places. K was calculated using an established equation,  
646 allowing for a thorough evaluation of the water-bearing capacity of the rock mass for  
647 groundwater assessment throughout the whole research region. Sandstone of a high potential  
648 aquifer (HPA) was characterized in a three-layer hydrogeological model with a resistivity below  
649 350  $\Omega\text{m}$  and a K range of 5 to 30 m/d. Using a resistivity increase of 350 to 700  $\Omega\text{m}$  and a K  
650 range of 1 to 5 m/d, hornstone of a medium potential aquifer (MPA) was evaluated. Granite of  
651 the low-negligible potential aquifer (L-NPA) was evaluated using K values ranging from 0 to 1  
652 m/d and a resistivity value higher than 700  $\Omega\text{m}$ . The results indicate that when the K parameter  
653 increases and resistivity lowers, the rock mass holds a greater amount of water. Deep  
654 groundwater resources in hard rock were anticipated to rely on the premise that the optimal rock  
655 mass for maximum water-bearing capacity would consist of sandstone, whereas the rock mass  
656 with minimal groundwater presence would be granite. According to our predicted 2D/3D K  
657 models, deep groundwater extraction was conducted in central regions below 700 m depth and in  
658 adjacent areas around granite at depths ranging from 0 to 1300 m. A significant correlation  
659 between the local geology, hydrogeology, and the K models has been identified. Our research  
660 indicates that this method may serve as a more cost-effective alternative to expensive drills for

661 acquiring more precise hydrogeological modeling maps, in contrast to traditional procedures. In  
662 groundwater investigations of hard rock, geophysical methods can bridge the gap between solid  
663 hydrogeological models and insufficient drilling data by efficiently and comprehensively  
664 assessing the water-retention capacity of the rock mass. Future study could enhance the  
665 explanation of aquifer parameters by refining empirical equations through the application of  
666 groundwater hydrogeological concepts. This technique would improve the understanding of the  
667 interaction between geophysical and aquifer parameters, hence augmenting its significance in  
668 groundwater applications.

#### 669 **CRedit authorship contribution statement**

670 **Muhammad Hasan:** Data curation, Visualization, Validation, Supervision, Resources,  
671 Software, Funding acquisition, Conceptualization, Investigation, Methodology, Formal analysis,  
672 Project administration, Roles/Writing – original draft, Writing review and editing; **Lijun Su:**  
673 Software, Funding acquisition, Conceptualization, Investigation; **Peng Cui:** Visualization,  
674 Investigation, Validation; **Yanjun Shang:** Data curation, Software

#### 675 **Declaration of competing interest**

676 The authors of this paper declare that they have no conflict of interest.

#### 677 **Acknowledgements**

678 This research was financially supported by the National Natural Science Foundation of  
679 China's Research Fund for International Young Scientists (RFIS-I) (Grant No. 42350410442),  
680 and International Science and Technology Cooperation Program of Shanghai Cooperation  
681 Organization, Science and Technology Department, Xinjiang, China (Grant No. E202301005).

682 The authors wish to acknowledge the institutions that facilitated the research for this study: the  
683 State Key Laboratory of Mountain Hazards and Engineering Resilience, Institute of Mountain  
684 Hazards and Environment, Chinese Academy of Sciences, and China-Pakistan Joint Research  
685 Center on Earth Sciences, CAS-HEC, Islamabad, Pakistan.

#### 686 **Data availability**

687 Data available on request from the corresponding author

#### 688 **References**

- 689 1. Abbas, M., Deparis, J., Isch, A., Mallet, C., Jodry, C., Azaroual, M., Abbar, B., Baltassat,  
690 J.M., 2022. Hydrogeophysical characterization and determination of petrophysical  
691 parameters by integrating geophysical and hydrogeological data at the limestone vadose  
692 zone of the Beauce aquifer. *Journal of Hydrology* 615, 128725.
- 693 2. Amiotte Suchet, P., Probst, J.L., Ludwig, W., 2003. Worldwide distribution of  
694 continental rock lithology: Implications for the atmospheric/ soil CO<sub>2</sub> uptake by  
695 continental weathering and alkalinity river transport to the oceans. *Glob Biogeochem*  
696 *Cycles* 17, 1038.
- 697 3. An, Z., Di, Q., 2016. Investigation of geological structures with a view to HLRW  
698 disposal, as revealed through 3D inversion of aeromagnetic and gravity data and the  
699 results of CSAMT exploration. *Journal of Applied Geophysics* 135, 204–211.
- 700 4. An, Z., Di, Q., Wu, F., Wang, G., Wang, R., 2012. Geophysical exploration for a long  
701 deep tunnel to divert water from the Yangtze to the Yellow River, China. *Bulletin of*  
702 *Engineering Geology and the Environment* 71, 195–200



- 703 5. Asfahani, J., 2023. Estimation of the hydraulic parameters by using an alternative vertical  
704 electrical sounding technique: case study from semiarid Khanasser valley region  
705 Northern Syria. *Acta Geophys* 71, 997–1013.
- 706 6. Attwa, M., Basokur, A., Akca, I., 2014. Hydraulic conductivity estimation using direct  
707 current (DC) sounding data: a case study in East Nile Delta Egypt. *Hydrgeol J* 22, 1163–  
708 1178.
- 709 7. Bai, D., Unsworth, M., Meju, M., Ma, X., Teng, J., Kong, X., Sun, Y., Sun, J., Wang, L.,  
710 Jiang, C., Zhao, C., Xiao, P., Liu, M., 2010. Crustal deformation of the eastern Tibetan  
711 plateau revealed by magnetotelluric imaging. *Nature Geosci* 3, 358–362.
- 712 8. Bentley, L.R., Gharibi, M., 2004. Two- and three-dimensional electrical resistivity  
713 imaging at a heterogeneous remediation site. *Geophysics* 69, 674–680.
- 714 9. Borah, U.K., Patro, P.K., 2019. Estimation of the depth of investigation in the  
715 magnetotelluric method from the phase. *Geophysics* 84 (6), E377–E385.
- 716 10. Bréard Lanoix, M.L., Pabst, T., Aubertin, M., 2020. Correction: field determination of  
717 the hydraulic conductivity of a compacted sand layer controlling water flow on an  
718 experimental mine waste rock pile. *Hydrogeol J* 28, 1517.
- 719 11. Cagniard, L., 1953. Basic theory of the magneto-telluric method of geophysical  
720 prospecting. *Geophysics* 18 (3), 605–635.
- 721 12. Camporese, M., Cassiani, G., Deiana, R., Salandin, P., 2011. Assessment of local  
722 hydraulic properties from electrical resistivity tomography monitoring of a  
723 three-dimensional synthetic tracer test experiment. *Water Resources Research*, 47 (12).
- 724 13. Cassidy, R., Comte, J.C., Nitsche, J., Wilson, C., Flynn, R., Ofterdinger, U., 2014.  
725 Combining multi-scale geophysical techniques for robust hydro-structural

- 726 characterisation in catchments underlain by hard rock in post-glacial regions. *Journal of*  
727 *Hydrology* 517, 715–731.
- 728 14. Chambers, J.E., Kuras, O., Meldrum, P.I., Ogilvy, R.D., Hollands, J., 2006. Electrical  
729 resistivity tomography applied to geologic, hydrogeologic, and engineering investigations  
730 at a former waste-disposal site. *Geophysics* 71 (6), B231–B239.
- 731 15. Chandra, S., Ahmed, S., Ram, A., Dewandel, B., 2008. Estimation of hard rock aquifers  
732 hydraulic conductivity from geoelectrical measurements: a theoretical development with  
733 field application. *J Hydrol* 357, 218–227.
- 734 16. Chen, J., Hubbard, S., Rubin, Y., 2001. Estimating the hydraulic conductivity at the  
735 South Oyster Site from geophysical tomographic data using Bayesian techniques based  
736 on the normal linear regression model displays variation Oyster Site. *Water Resour Res* 6,  
737 1603–1613.
- 738 17. Courtois, N., Lachassagne, P., Wyns, R., Blanchin, R., Bougaire, F.D., Some, S.,  
739 Tapsoba, A., 2010. Large-scale mapping of hard-rock aquifer properties applied to  
740 Burkina Faso. *Groundwater* 48 (2), 269–283.
- 741 18. Cui, L.X., Cheng, Q., So, P.S., Tang, C.S., Tian, B.G., Li, C.Y., 2024. Relationship  
742 between root characteristics and saturated hydraulic conductivity in a grassed clayey soil.  
743 *Journal of Hydrology* 645 (2), 132231.
- 744 19. da Silva, C.C.N., de Medeiros, W.E., de Sá, E.F.J., Neto, P.X., 2004. Resistivity and  
745 ground-penetrating radar images of fractures in a crystalline aquifer: a case study in  
746 Caiçara farm—NE Brazil. *Journal of Applied Geophysics* 56 (4), 295–307.
- 747 20. De Lima, O.A.L., Niwas, S., 2000. Estimation of hydraulic parameters of shaly sandstone  
748 aquifers from geological measurements. *J Hydrol* 235, 12–26.

- 749 21. Dewandel, B., Aunay, B., Maréchal, J.C., Roques, C., Bour, O., Mougin, B., Aquilina, L.,  
750 2014. Analytical solutions for analysing pumping tests in a sub-vertical and anisotropic  
751 fault zone draining shallow aquifers. *J Hydrol* 509, 115–131.
- 752 22. Dewandel, B., Jeanpert, J., Ladouche, B., Join, J.L., Maréchal, J.C., 2017. Inferring the  
753 heterogeneity, transmissivity and hydraulic conductivity of crystalline aquifers from a  
754 detailed water-table map. *J Hydrol* 550, 118–129.
- 755 23. Dewandel, B., Lachassagne, P., Qatan, A., 2004. Spatial measurements of stream  
756 baseflow, a relevant method for aquifer characterization and permeability evaluation:  
757 application to a hard-rock aquifer, the Oman ophiolite. *Hydrol Process* 18(17), 3391–  
758 3400.
- 759 24. Di, Q., Fu, C., An, Z., Wang, R., Wang, G., Wang, M., Qi, S., Liang, P., 2020. An  
760 application of CSAMT for detecting weak geological structures near the deeply buried  
761 long tunnel of the Shijiazhuang-Taiyuan passenger railway line in the Taihang Mountains.  
762 *Engineering Geology* 268, 105517.
- 763 25. Fernando, A., Pacheco, L., 2015. Regional groundwater flow in hard rocks. *Science of*  
764 *the Total Environment* 506–507, 182–195.
- 765 26. Ferris, D.M., Potter, G., Ferguson, G., 2020. Characterization of the hydraulic  
766 conductivity of glacial till aquitards. *Hydrogeol J* 28, 1827–1839.
- 767 27. Francese, R., Mazzarini, F., Bistacchi, A., Morelli, G., Pasquarè, G., Praticelli, N., Zaja,  
768 A., 2009. A structural and geophysical approach to the study of fractured aquifers in the  
769 Scansano-Magliano in Toscana Ridge, southern Tuscany, Italy. *Hydrogeology Journal* 17  
770 (5), 1233.

- 771 28. Fu, C., Di, Q., An, Z., 2013. Application of the CSAMT method to groundwater  
772 exploration in a metropolitan environment. *Geophysics* 78 (5), 201–B209.
- 773 29. Fu, T., Chen, H., Zhang, W., Nie, Y., Wang, K., 2015. Vertical distribution of soil  
774 saturated hydraulic conductivity and its influencing factors in a small karst catchment in  
775 Southwest China. *Environ Monit Assess* 187, 92.
- 776 30. Fusheng, G., Haiyan, Y., Zengqian, H., Zhichun, W., Ziyu, L., Guocan, W., Linfu, X., Ye,  
777 G., Wanpeng, Z., 2022. Structural setting of the Zoujiashan-Julong'an region, Xiangshan  
778 volcanic basin, China, interpreted from modern CSAMT data. *Ore Geology Reviews*. 150,  
779 105180.
- 780 31. Gao, Q., Hasan, M., Shang Y., Qi, S., 2024. Geophysical estimation of 2D hydraulic  
781 conductivity for groundwater assessment in hard rock. *Acta Geophys* 72, 4343–4354.
- 782 32. Hasan, M., Shang, Y., Di, Q., Meng, Q., 2024. Estimation of Young's modulus for rocks  
783 using a non-invasive CSAMT method. *Bulletin of Engineering Geology and the*  
784 *Environment* 83, 464.
- 785 33. Hasan, M., Shang, Y., Jin, W., Akhter, G., 2021. Estimation of hydraulic parameters in a  
786 hard rock aquifer using integrated surface geoelectrical method and pumping test data in  
787 southeast Guangdong China. *Geosci J* 25 (2), 223–242.
- 788 34. Hu, X.Y., Peng, R.H., Wu, G.J., Wang, W.P., Huo, G.P., Han, B., 2013. Mineral  
789 exploration using CSAMT data: application to Longmen region metallogenic belt,  
790 Guangdong Province, China. *Geophysics* 78, B111–B119.
- 791 35. Hubbard, S.H., Rubin, Y., 2002. Hydrogeological parameter estimation using  
792 geophysical data: a review of selected techniques. *J Contam Hydrol* 45 (3), 34.

- 793 36. Jasechko, S., Seybold, H., Perrone, D., Fan, Y., Shamsudduha, M., Taylor, R.G., Fallatah,  
794 O., Kirchner, J.W., 2024. Rapid groundwater decline and some cases of recovery in  
795 aquifers globally. *Nature* 625, 715–721.
- 796 37. Kouadio, K.L., Liu, R., Malory, A.O., Liu, C., 2023. A novel approach for water  
797 reservoir mapping using controlled source audio-frequency magnetotelluric in Xingning  
798 area, Hunan Province, China. *Geophysical Prospecting* 71, 1708–1727.
- 799 38. Kouadio, K.L., Xu, Y., Liu, C.M., Boukhalfa, Z., 2020. Two-dimensional inversion of  
800 CSAMT data and three-dimensional geological mapping for groundwater exploration in  
801 Tongkeng Area, Hunan Province, China. *Journal of Applied Geophysics* 183, 104204.
- 802 39. Lachassagne, P., Dewandel, B., Wyns, R., 2021. Review: Hydrogeology of weathered  
803 crystalline/hard-rock aquifers—guidelines for the operational survey and management of  
804 their groundwater resources. *Hydrogeol J* 29, 2561–2594.
- 805 40. Lachassagne, P., Wyns, R., Bérard, P., Bruel, T., Chéry, L., Coutand, T., Le Strat, P.,  
806 2001. Exploitation of high-yields in hard-rock aquifers: Downscaling methodology  
807 combining GIS and multicriteria analysis to delineate field prospecting  
808 zones. *Groundwater* 39 (4), 568–581.
- 809 41. Laghari, A.N., Vanham, D., Rauch, W., 2012. The Indus basin in the framework of  
810 current and future water resources management. *Hydrology and Earth System*  
811 *Sciences* 16 (4), 1063–1083.
- 812 42. Leal, J., Avila, E.A., Darghan, A.E., Lobo, D., 2023. Selection of spatial prediction  
813 models of saturated hydraulic conductivity in soils containing rock fragments in an  
814 Andean micro-basin. *Model Earth Syst Environ* 9, 4223–4235.

- 815 43. Lin, C.H., Lin, C.P., Hung, Y.C., Chung, C.C., Wu, P.L., Liu, H.C., 2018. Application of  
816 geophysical methods in a dam project: Life cycle perspective and Taiwan experience.  
817 *Journal of Applied Geophysics* 158, 82–92.
- 818 44. Loperte, A., Soldovieri, F., Palombo, A., Santini, F., Lapenna, V., 2016. An integrated  
819 geophysical approach for water infiltration detection and characterization at Monte  
820 Cotugno rock-fill dam (southern Italy). *Eng Geol* 211, 162–170.
- 821 45. Majumdar, R.K., Das, D., 2011. Hydrological characterization and estimation of aquifer  
822 properties from electrical sounding data in Sagar Island region, South 24 Parganas, West  
823 Bengal, India. *Asian J Earth Sci* 4, 60–74.
- 824 46. Maréchal, J.C., Dewandel, B., Subrahmanyam, K., 2004. Use of hydraulic tests at  
825 different scales to characterize fracture network properties in the weathered-fractured  
826 layer of a hard rock aquifer. *Water Resources Research* 40 (11).
- 827 47. McLachlan, P.J., Chambers, J.E., Uhlemann, S.S., Binley, A., 2017. Geophysical  
828 characterisation of the groundwater–surface water interface. *Advances in Water*  
829 *Resources* 109, 302–319.
- 830 48. Minutti, C., Illman, W.A., Gomez, S., 2020. A new inverse modeling approach for  
831 hydraulic conductivity estimation based on Gaussian mixtures. *Water Resources*  
832 *Research*, 56 (9), e2019WR026531.
- 833 49. Mira Geoscience Ltd., 1999. GOCAD Mining Suite 3D Geological Modeling Software.  
834 Nancy University, Lorraine, France.
- 835 50. Misstear, R., Brown, L., Daly, D., 2009. A methodology for making initial estimates of  
836 groundwater recharge from groundwater vulnerability mapping. *Hydrogeology*  
837 *Journal* 17 (2), 275.

- 838 51. Nguyen, M., Lin, Y.N., Tran, Q.C., Ni, C.F., Chan, Y.C., Tseng, K.H., Chang, C.P., 2022.  
839 Assessment of long-term ground subsidence and groundwater depletion in Hanoi,  
840 Vietnam. *Engineering Geology* 299, 106555.
- 841 52. Niwas, S., Celik, M., 2012. Equation estimation of porosity and hydraulic conductivity of  
842 Ruhrtal aquifer in Germany using near surface geophysics. *J Appl Geophys* 84, 77–85.
- 843 53. Niwas, S., De Lima, O.A.L., 2003. Aquifer parameter estimation from surface resistivity  
844 data. *Groundwater* 41, 94–99.
- 845 54. Nwosu, L.I., Nwankwo, C.N., Ekine, A.S., 2013. Geoelectric investigation of the  
846 hydraulic properties of the aquiferous zones for evaluation of groundwater potentials in  
847 the complex geological area of imostate, Nigeria. *Asian J Earth Sci* 6, 1–15.
- 848 55. Oli, I.C., Opara, A.I., Okeke, O.C., Akaolisa, C.Z., Akakuru, O.C., Osi-Okeke, I., Udeh,  
849 H.M., 2022. Evaluation of aquifer hydraulic conductivity and transmissivity of  
850 Ezza/Ikwo area, Southeastern Nigeria, using pumping test and surficial resistivity  
851 techniques. *Environ Monit Assess* 194, 719.
- 852 56. Parks, E.M., McBride, J.H., Nelson, S.T., Tingey, D.G., Mayo, A.L., Guthrie, W.S.,  
853 Hoopes, J.C., 2011. Comparing electromagnetic and seismic geophysical methods:  
854 estimating the depth to water in geologically simple and complex arid environments.  
855 *Engineering Geology* 117 (1–2), 62–77.
- 856 57. Phoenix Geophysics CMTPro, 2020. The Canadian Phoenix CMT Pro Version software  
857 for CSAMT data processing. Toronto, Ontario, Canada.
- 858 58. Phoenix Geophysics CSAMT-SW, 2020. The Canadian Phoenix CSAMT-SW Version  
859 software for CSAMT data inversion. Toronto, Ontario, Canada.

- 860 59. Porsani, J.L., Elis, V.R., Hiodo, F.Y., 2005. Geophysical investigations for the  
861 characterization of fractured rock aquifers in Itu, SE Brazil. *Journal of Applied*  
862 *Geophysics*, 57 (2), 119–128.
- 863 60. Purvance, D.T., Andricevic, R., 2000. On the electrical-hydraulic conductivity correlation  
864 in aquifers. *Water Resour Res* 36, 205–213.
- 865 61. Qin, X., 2017. Application of Unwedge program to geological stability analysis of deep  
866 buried deposits. *Comprehensive* 8, 270–273 (In Chinese)
- 867 62. Rao, P.V., Subrahmanyam, M., Raju, B.A.G., 2022. Investigation of groundwater  
868 potential zones in hard rock terrains along EGMB, India, using remote sensing,  
869 geoelectrical and hydrological parameters. *Acta Geophys* 71, 1867–1883.
- 870 63. Rashid, M., Lone, M.A., Ahmed, S., 2012. Integrating geospatial and ground geophysical  
871 information as guidelines for groundwater potential zones in hard rock terrains of south  
872 India. *Environ Monit Assess* 184, 4829–4839.
- 873 64. Refsgaard, J.C., Christensen, S., Sonnenborg, T.O., Seifert, D., Højberg, A.L., Trolborg,  
874 L., 2012. Review of strategies for handling geological uncertainty in groundwater flow  
875 and transport modeling. *Advances in Water Resources* 36, 36–50.
- 876 65. Robinson, J., Slater, L., Johnson, T., Shapiro, A., Tiedeman, C., Ntarlagiannis, D.,  
877 Johnson, C., Day-Lewis, F., Lacombe, P., Imbrigiotta, T., Lane, J., 2016. Imaging  
878 pathways in fractured rock using three-dimensional electrical resistivity tomography.  
879 *Groundwater* 54 (2), 186–201.
- 880 66. Rodell, M., Velicogna, I., Famiglietti, J.S., 2009. Satellite-based estimates of  
881 groundwater depletion in India. *Nature* 460 (7258), 999–1002.



- 882 67. Rodi, W., Mackie, R.L., 2001. Nonlinear conjugate gradients algorithm for 2-D  
883 magnetotelluric inversion. *Geophysics* 66 (1), 174–187.
- 884 68. Roques, C., Aquilina, L., Boisson, A., Vergnaud-Ayraud, V., Labasque, T.,  
885 Longuevergne, L., Laurencelle, M., Dufresne, A., de Dreuzy, J.R., Pauwels, H., Bour, O.,  
886 2018. Autotrophic denitrification supported by biotite dissolution in crystalline aquifers:  
887 (2) transient mixing and denitrification dynamic during long-term pumping. *Sci Total*  
888 *Environ* 619–620, 491–503.
- 889 69. Sale, H.S., 2001. Modelling of lithology and hydraulic conductivity of shallow sediments  
890 from resistivity measurements using Schlumberger vertical electric soundings. *Energy*  
891 *Sources* 23, 599–618.
- 892 70. Sikandar, P., Christen, E.W., 2012. Geoelectrical sounding for the estimation of hydraulic  
893 conductivity of alluvial aquifers. *Water Resour Manag* 26, 1201–1215.
- 894 71. Simpson, F., Bahr, K., 2005. *Practical magnetotellurics*. Cambridge University Press,  
895 Cambridge. 254 pp.
- 896 72. Singh, K.P., 2005. Nonlinear estimation of aquifer parameters from surficial resistivity  
897 measurements. *Hydrology and Earth System Sciences Discussions* 2 (3), 917–938.
- 898 73. Sinha, R., Israil, M., Singhal, D.C., 2009. A hydrogeological model of the relationship  
899 between geoelectric and hydraulic parameters of anisotropic aquifers. *Hydrogeol J* 17,  
900 495–503.
- 901 74. Slater, L., 2007. Near surface electrical characterization of hydraulic conductivity: from  
902 petrophysical properties to aquifer geometries—a review. *Surv Geophys* 28, 169–197.
- 903 75. Smith, J.T., Booker, J.R., 1991. Rapid inversion of two-and three-dimensional  
904 magnetotelluric data. *Journal of Geophysical Research: Solid Earth* 96 (B3), 3905–3922.

- 905 76. Soro, D.D., Koita, M., Biaou, C.A., Outoumbe, E., Vouillamoz, J.M., Yacouba, H.,  
906 Guérin, R., 2017. Geophysical demonstration of the absence of correlation between  
907 lineaments and hydrogeologically useful fractures: case study of the Sanon hard rock  
908 aquifer (central northern Burkina Faso). *J African Earth Sci* 129, 842–852.
- 909 77. Soupios, P.M., Kouli, M., Vallianatos, F., Vafidis, A., Stavroulakis, G., 2007. Estimation  
910 of aquifer hydraulic parameters from surficial geophysical methods: a case study of  
911 Keritis Basin in Chania (Crete–Greece). *J Hydrol* 1, 122–131.
- 912 78. Trinh, T., Kavvas, M.L., Ishida, K., Ercan, A., Chen, Z.Q., Anderson, M.L., Ho, C.,  
913 Nguyen, T., 2018. Integrating global land-cover and soil datasets to update saturated  
914 hydraulic conductivity parameterization in hydrologic modeling. *Science of the Total  
915 Environment* 631–632, 279–288.
- 916 79. Vassolo, S., Neukum, C., Tiberghien, C., Heckmann, M., Hahne Désiré, K., Baranyikwa,  
917 D., 2019. Hydrogeology of a weathered fractured aquifer system near Gitega, Burundi.  
918 *Hydrogeol J* 27, 625.
- 919 80. Vouillamoz, J.M., Lawson, F.M.A., Yalo, N., Descloitres, M., 2014. The use of magnetic  
920 resonance sounding for quantifying specific yield and transmissivity in hard rock aquifers:  
921 the example of Beni. *J Appl Geophys* 107, 16–24.
- 922 81. Wada, Y., Van Beek, L.P., Van Kempen, C.M., Reckman, J.W., Vasak, S., Bierkens,  
923 M.F., 2010. Global depletion of groundwater resources. *Geophysical Research Letters* 37  
924 (20).
- 925 82. Wada, Y., Wisser, D., Bierkens, M.F., 2014. Global modeling of withdrawal, allocation  
926 and consumptive use of surface water and groundwater resources. *Earth System  
927 Dynamics* 5 (1), 15–40.

- 928 83. Wang, R., Yin, C., Wang, M., Di, Q., 2015. Laterally constrained inversion for CSAMT  
929 data interpretation. *Journal of Applied Geophysics* 121, 63–70.
- 930 84. Webring, M.W., 1981. MINC: A Gridding Program Based on Minimum Curvature: U.S.  
931 Geological Survey Open File Report. 81–1224, p. 41p
- 932 85. Worthington, S.R.H., Davies, G.J., Alexander, E.C. Jr., 2016. Enhancement of bedrock  
933 permeability by weathering. *Earth-Sci Rev* 160, 188–202.
- 934 86. Wynn, J., Mosbrucker, A., Pierce, H., Spicer, K., 2016. Where is the hot rock and where  
935 is the ground water-using CSAMT to map beneath and around Mount St. Helens. *Journal*  
936 *of Environmental and Engineering Geophysics* 21, 79–87.
- 937 87. Yadav, G.S., Singh, S.K., 2007. Integrated resistivity surveys for delineation of fractures  
938 for ground water exploration in hard rock areas. *Journal of Applied Geophysics* 62 (3),  
939 301–312.
- 940 88. Yang, H.Q., Zhang, L., 2024. Bayesian back analysis of unsaturated hydraulic parameters  
941 for rainfall-induced slope failure: A review. *Earth-Science Reviews* 251, 104714.
- 942 89. Yang, J., Zhang, H., Cui, Z., 2021. Stability Analysis and Countermeasures of Rock  
943 Block in Underground Cavern. *Guangdong Water Resources and Hydropower* 5, 23–27.  
944 (In Chinese)
- 945 90. Yao, S., Zhang, T., Zhao, C., Liu, X., 2013. Saturated hydraulic conductivity of soils in  
946 the Horqin Sand Land of Inner Mongolia, northern China. *Environ Monit Assess* 185,  
947 6013–6021.
- 948 91. Zhang, J., Sirieix, C., Genty, D., Salmon, F., Verdet, C., Mateo, S., Xu, S., Bujan, S.,  
949 Devaux, L., Larcanché, M., 2024. Imaging hydrological dynamics in karst unsaturated

- 950 zones by time-lapse electrical resistivity tomography. *Science of the Total Environment*  
951 907, 168037.
- 952 92. Zhang, M., Farquharson, C.G., Li, C., 2021. Improved controlled source audio-frequency  
953 magnetotelluric method apparent resistivity pseudo-sections based on the frequency and  
954 frequency–spatial gradients of electromagnetic fields. *Geophysical Prospecting* 69, 474–  
955 490.
- 956 93. Zonge, K.L., Hughes, L.J., 1988. *Electromagnetic Methods—Theory and Practice*.
- 957 94. Zoorabadi, M., Saydam, S., Timms, W., Hebblewhite, B., 2022. Analytical methods to  
958 estimate the hydraulic conductivity of jointed rocks. *Hydrogeol J* 30, 111–119.

**Declaration of interests**

The authors declare that they have no known competing financial interests or personal relationships that could have appeared to influence the work reported in this paper.

The author is an Editorial Board Member/Editor-in-Chief/Associate Editor/Guest Editor for *[Journal name]* and was not involved in the editorial review or the decision to publish this article.

The authors declare the following financial interests/personal relationships which may be considered as potential competing interests:
